# Supplementary material for: Tumor-nonspecific vaccines improve the efficacy of CD3 bispecific antibody therapy in solid tumors
Source: Research Square preprint supplement (doi:10.21203/rs.3.rs-2470572/v1), 2023-01-24
Supplement: Supplementary file 1 [file b0644fece15ce58ee3911a29.xlsx]

## Sheet: NS_MM_CANCERIMM_C3400_Jim 1 and
Treatment group					Untreated					Bisp					OVA + Bisp						OT-1 + OVA				OT-1 + OVA + Bisp
File Name			20211129_MmV1 CancerImmune Jim1_01_02.RCC	20211129_MmV1 CancerImmune Jim1_01_03.RCC	20211129_MmV1 CancerImmune Jim1_01_08.RCC	20211130_MmV1 CancerImmune Jim2_01_10.RCC	20211130_MmV1 CancerImmune Jim2_01_11.RCC	20211129_MmV1 CancerImmune Jim1_01_04.RCC	20211129_MmV1 CancerImmune Jim1_01_09.RCC	20211129_MmV1 CancerImmune Jim1_01_10.RCC	20211130_MmV1 CancerImmune Jim2_01_03.RCC	20211130_MmV1 CancerImmune Jim2_01_04.RCC	20211129_MmV1 CancerImmune Jim1_01_05.RCC	20211129_MmV1 CancerImmune Jim1_01_11.RCC	20211129_MmV1 CancerImmune Jim1_01_12.RCC	20211130_MmV1 CancerImmune Jim2_01_05.RCC	20211130_MmV1 CancerImmune Jim2_01_06.RCC	20211130_MmV1 CancerImmune Jim2_01_12.RCC	20211129_MmV1 CancerImmune Jim1_01_06.RCC	20211129_MmV1 CancerImmune Jim1_01_07.RCC	20211130_MmV1 CancerImmune Jim2_01_01.RCC	20211130_MmV1 CancerImmune Jim2_01_08.RCC	20211130_MmV1 CancerImmune Jim2_01_09.RCC	20211129_MmV1 CancerImmune Jim1_01_01.RCC	20211130_MmV1 CancerImmune Jim2_01_02.RCC	20211130_MmV1 CancerImmune Jim2_01_07.RCC
Description			Jim 1	Jim 1	Jim 1	Jim 2	Jim 2	Jim 1	Jim 1	Jim 1	Jim 2	Jim 2	Jim 1	Jim 1	Jim 1	Jim 2	Jim 2	Jim 2	Jim 1	Jim 1	Jim 2	Jim 2	Jim 2	Jim 1	Jim 2	Jim 2
Sample ID			2	3	8	10	11	4	9	10	3	4	5	11	12	5	6	12	6	7	1	8	9	1	2	7
Sample Date			11/29/2021	11/29/2021	11/29/2021	11/30/2021	11/30/2021	11/29/2021	11/29/2021	11/29/2021	11/30/2021	11/30/2021	11/29/2021	11/29/2021	11/29/2021	11/30/2021	11/30/2021	11/30/2021	11/29/2021	11/29/2021	11/30/2021	11/30/2021	11/30/2021	11/29/2021	11/30/2021	11/30/2021
File Version			1.7	1.7	1.7	1.7	1.7	1.7	1.7	1.7	1.7	1.7	1.7	1.7	1.7	1.7	1.7	1.7	1.7	1.7	1.7	1.7	1.7	1.7	1.7	1.7
Gene RLF			NS_MM_CANCERIMM_C3400	NS_MM_CANCERIMM_C3400	NS_MM_CANCERIMM_C3400	NS_MM_CANCERIMM_C3400	NS_MM_CANCERIMM_C3400	NS_MM_CANCERIMM_C3400	NS_MM_CANCERIMM_C3400	NS_MM_CANCERIMM_C3400	NS_MM_CANCERIMM_C3400	NS_MM_CANCERIMM_C3400	NS_MM_CANCERIMM_C3400	NS_MM_CANCERIMM_C3400	NS_MM_CANCERIMM_C3400	NS_MM_CANCERIMM_C3400	NS_MM_CANCERIMM_C3400	NS_MM_CANCERIMM_C3400	NS_MM_CANCERIMM_C3400	NS_MM_CANCERIMM_C3400	NS_MM_CANCERIMM_C3400	NS_MM_CANCERIMM_C3400	NS_MM_CANCERIMM_C3400	NS_MM_CANCERIMM_C3400	NS_MM_CANCERIMM_C3400	NS_MM_CANCERIMM_C3400
Comments
Lane ID			2	3	8	10	11	4	9	10	3	4	5	11	12	5	6	12	6	7	1	8	9	1	2	7
FOV Count			490	490	490	490	490	490	490	490	490	490	490	490	490	490	490	490	490	490	490	490	490	490	490	490
FOV Counted			486	490	484	475	474	483	487	487	485	489	490	485	481	486	486	485	484	487	482	484	486	489	490	487
Scanner ID			1911C0666	1911C0666	1911C0666	1911C0666	1911C0666	1911C0666	1911C0666	1911C0666	1911C0666	1911C0666	1911C0666	1911C0666	1911C0666	1911C0666	1911C0666	1911C0666	1911C0666	1911C0666	1911C0666	1911C0666	1911C0666	1911C0666	1911C0666	1911C0666
Stage Position			1	1	1	1	1	1	1	1	1	1	1	1	1	1	1	1	1	1	1	1	1	1	1	1
Binding Density			1.51	0.71	1.86	2.24	0.66	0.74	0.68	0.75	0.91	0.5	0.66	0.69	1.01	1.98	0.74	0.54	0.58	0.7	1.95	1.4	1.94	0.87	0.89	1.11
Messages
Positive	POS_A	ERCC_00117.1	27951	41833	24537	22201	45505	38033	44211	51071	37740	48477	44901	50859	43064	24442	45824	51406	33759	43567	22758	35647	25731	42280	37774	37353
Positive	POS_B	ERCC_00112.1	10656	15319	9101	8090	17048	13831	16317	18604	13875	18272	16108	18222	15680	8949	17489	18562	12496	15466	8429	12758	9347	15169	13150	12579
Positive	POS_C	ERCC_00002.1	2603	3621	2341	2053	4161	3276	3810	4232	3329	4520	4073	4404	3741	2287	4317	4539	2924	3876	2117	3221	2366	3903	3358	3222
Positive	POS_D	ERCC_00092.1	605	917	531	530	978	842	976	1108	865	1057	1008	1108	973	551	989	1140	776	1041	471	790	573	925	816	823
Positive	POS_E	ERCC_00035.1	102	146	92	99	149	129	174	185	154	196	148	190	148	110	205	207	115	187	76	115	104	178	152	157
Positive	POS_F	ERCC_00034.1	44	81	36	48	83	54	71	71	71	90	82	89	73	47	72	80	45	63	54	52	47	65	63	52
Negative	NEG_A	ERCC_00096.1	11	13	11	13	12	17	10	7	13	14	20	16	15	18	16	11	7	11	9	10	7	16	16	15
Negative	NEG_B	ERCC_00041.1	9	6	12	15	13	8	21	5	9	19	12	10	16	18	12	18	4	14	12	12	7	10	9	12
Negative	NEG_C	ERCC_00019.1	21	12	29	15	19	14	13	14	18	16	14	10	23	13	17	21	9	29	20	23	19	17	19	29
Negative	NEG_D	ERCC_00076.1	4	8	8	13	6	6	6	7	11	11	5	8	16	18	14	8	6	9	9	9	7	15	10	11
Negative	NEG_E	ERCC_00098.1	9	17	12	13	20	25	18	13	25	24	17	21	16	16	24	22	16	13	15	28	26	22	17	24
Negative	NEG_F	ERCC_00126.1	23	22	18	27	21	10	16	29	18	24	21	21	30	13	33	20	15	25	20	29	17	23	26	27
Negative	NEG_G	ERCC_00144.1	9	10	12	10	19	5	8	13	9	15	7	6	12	10	18	17	8	12	5	15	9	14	11	14
Negative	NEG_H	ERCC_00154.1	15	16	20	11	20	10	13	8	15	21	7	10	14	8	22	31	11	14	11	8	15	8	15	14
Endogenous	A2m	NM_175628.3	28	8	15	15	24	20	26	25	38	18	18	13	30	21	38	27	24	22	84	37	36	24	64	38
Endogenous	Abca1	NM_013454.3	654	367	444	426	275	486	299	472	415	372	833	820	1017	842	671	349	538	683	730	741	826	838	1800	3896
Endogenous	Abcb1a	NM_011076.1	2509	1432	2478	2553	1355	687	643	794	782	776	590	557	971	2142	784	256	1525	1303	2976	3020	4344	1093	1075	590
Endogenous	Abcg1	NM_009593.1	346	215	253	287	141	478	354	449	554	269	874	641	1038	859	629	380	382	532	429	578	556	903	1173	2310
Endogenous	Abl1	NM_009594.4	2480	1102	2439	2636	1139	763	788	703	1316	692	407	448	1063	1675	861	335	874	753	2223	1919	2434	590	572	740
Endogenous	Ada	NM_007398.3	276	218	340	344	160	187	191	188	196	128	140	124	167	325	184	107	177	233	405	342	407	231	176	241
Endogenous	Adora2a	NM_009630.2	130	90	231	191	96	79	77	103	139	67	109	107	143	231	110	55	104	92	156	153	198	229	200	220
Endogenous	Aicda	NM_009645.2	12	14	12	18	22	14	15	19	19	30	10	13	16	13	16	32	16	15	15	17	15	12	14	14
Endogenous	Aire	NM_009646.1	26	31	23	36	26	23	22	28	27	26	26	23	41	42	29	29	15	30	29	28	30	16	30	13
Endogenous	Akt3	NM_011785.3	1167	688	1147	1095	444	473	509	396	570	300	441	398	442	1247	541	299	470	498	1336	1146	1026	745	545	576
Endogenous	Alcam	NM_009655.1	4490	1789	5176	4477	2406	1079	1031	1104	1579	756	578	619	898	2621	952	610	1020	1098	4157	2614	4201	880	840	529
Endogenous	Ambp	NM_007443.3	271	308	544	340	158	98	100	142	135	49	40	49	48	126	60	56	67	96	196	142	270	43	28	34
Endogenous	Amica1	NM_001005421.4	184	142	136	156	111	306	157	286	273	140	572	422	622	562	395	210	310	441	520	534	536	1825	1195	1133
Endogenous	Angpt1	NM_009640.3	19	9	21	11	21	19	7	8	6	7	10	12	16	9	13	11	12	20	21	8	14	9	14	34
Endogenous	Angpt2	NM_007426.3	285	100	281	227	173	249	123	168	186	124	103	113	101	279	150	88	124	158	391	229	298	117	152	132
Endogenous	Anp32b	NM_130889.2	6178	4348	5534	7654	3049	5368	4050	4123	5374	3306	4104	3836	6508	7434	5136	3191	3686	3985	5040	6031	7090	7228	6092	4924
Endogenous	Anxa1	NM_010730.2	4197	2752	3360	4961	1921	3621	3086	2967	3942	2199	2034	2227	2992	4673	2518	1998	1942	2607	3197	3766	5293	2523	2199	2570
Endogenous	Apoe	NM_009696.3	5845	3452	3587	3149	2215	5998	1869	4185	3616	1668	2988	2865	3857	5259	3704	2544	3694	7572	6158	4838	5370	4878	7369	51327
Endogenous	App	NM_007471.2	12298	6056	14665	14338	6768	6004	5742	5220	8529	4025	3603	4240	6707	11374	5504	3342	4763	5009	14305	12643	13796	4111	5669	6991
Endogenous	Arg1	NM_007482.3	1134	321	348	795	476	2547	518	1444	948	2359	3438	3990	5193	3146	2016	2070	710	872	781	1238	2158	2568	11246	4351
Endogenous	Arg2	NM_009705.2	56	24	37	51	35	322	214	303	315	138	420	385	422	372	167	403	16	35	54	37	68	179	634	75
Endogenous	Atf1	NM_007497.3	523	334	479	509	215	384	324	360	433	221	301	276	463	672	366	240	326	314	427	576	516	522	486	412
Endogenous	Atf2	NM_001284371.1	1573	1176	1344	1347	558	884	1130	1200	960	708	844	1002	1198	1370	929	750	965	1332	1067	1641	1340	1088	927	905
Endogenous	Atg10	NM_025770.3	581	283	494	538	223	171	237	178	274	137	136	136	266	404	255	114	302	272	426	537	485	219	188	207
Endogenous	Atg12	NM_026217.1	1154	649	880	1097	413	565	590	473	679	391	418	383	633	884	614	339	438	538	858	1092	934	698	651	587
Endogenous	Atg16l1	NM_001205391.1	1700	1375	1745	1538	754	687	871	734	1003	575	732	683	1127	1624	1066	409	1252	1235	1740	2218	1743	1081	1006	824
Endogenous	Atg5	NM_053069.5	276	138	235	275	118	162	145	151	147	103	167	168	216	260	171	111	122	159	230	234	281	275	272	399
Endogenous	Atg7	NM_028835.1	545	333	606	544	271	249	241	268	314	178	213	195	302	510	270	128	285	277	614	554	633	329	313	313
Endogenous	Atm	NM_007499.2	1040	614	1098	932	442	338	503	361	525	217	372	396	593	1037	555	179	589	584	930	817	884	602	443	411
Endogenous	Axl	NM_009465.3	5703	1595	3041	5363	2159	1572	1108	920	2210	1153	871	696	1671	3388	1584	571	1471	1219	3797	3086	4168	1553	1233	1871
Endogenous	Batf	NM_016767.2	16	25	23	29	24	55	44	107	77	57	233	178	226	168	107	58	64	75	71	52	69	418	392	406
Endogenous	Bax	NM_007527.3	572	329	550	633	277	319	315	238	441	226	286	263	406	573	356	198	293	240	510	524	573	437	438	404
Endogenous	Bcl10	NM_009740.1	1032	690	855	953	402	713	720	670	689	394	551	573	664	1186	593	425	664	776	1114	1292	940	1075	926	1003
Endogenous	Bcl2	NM_009741.3	1162	1090	1166	1010	469	372	711	661	602	430	277	419	755	814	494	242	598	601	660	1342	947	264	264	196
Endogenous	Bcl2l1	NM_009743.4	2935	2103	2754	2937	1199	1436	1930	1643	1962	1088	1268	1211	2001	2871	1821	968	1848	1963	2863	3895	2931	1487	1464	739
Endogenous	Bcl6	NM_009744.3	235	158	169	104	91	96	110	141	124	90	118	118	160	199	113	77	72	71	175	143	149	108	131	135
Endogenous	Bid	NM_007544.3	593	332	558	522	237	261	313	243	381	167	283	252	337	763	350	180	252	244	542	476	517	387	300	274
Endogenous	Birc5	NM_009689.2	663	420	482	630	294	406	317	369	497	269	394	364	678	705	542	195	403	347	336	522	618	684	562	467
Endogenous	Blk	NM_007549.2	4	7	7	11	5	7	5	6	11	1	10	9	12	9	5	8	5	3	18	6	7	6	9	8
Endogenous	Blnk	NM_008528.4	42	19	31	31	10	35	23	25	26	30	27	30	33	41	25	20	23	40	97	40	51	27	46	349
Endogenous	Bmi1	NM_007552.4	274	113	197	286	124	127	90	119	124	81	97	93	121	223	94	79	64	118	210	147	219	139	115	104
Endogenous	Bst1	NM_009763.3	96	84	76	101	76	432	198	326	429	226	745	737	675	676	350	369	97	153	151	149	209	320	1163	1283
Endogenous	Bst2	NM_198095.2	2028	1052	1787	1996	1099	3788	3633	2433	7212	2073	3348	3762	7114	10171	5823	2913	1097	982	2697	2707	2693	3766	3420	1764
Endogenous	Btk	NM_013482.2	92	50	45	71	55	133	98	146	171	92	196	171	216	211	118	155	37	87	95	84	120	77	245	457
Endogenous	Btla	NM_001037719.2	32	32	36	24	21	20	19	22	38	35	53	35	53	66	39	18	21	32	86	60	54	44	80	85
Endogenous	C1qa	NM_007572.2	1175	490	664	862	519	1568	441	990	1313	410	1331	1136	1629	1706	980	659	463	1142	1274	829	1357	1072	1949	8556
Endogenous	C1qb	NM_009777.2	1386	691	810	1120	636	2086	648	1308	1817	525	2078	1759	2299	2353	1494	1011	729	1710	1569	1143	1849	1722	3739	16976
Endogenous	C1qbp	NM_007573.2	2851	1710	2861	3236	1565	1743	1502	1710	1692	849	1312	1195	1310	2713	1331	879	1309	1482	2484	2035	3049	2425	1794	1656
Endogenous	C1ra	NM_023143.3	354	139	324	297	198	580	374	546	980	257	508	588	800	1729	697	261	217	248	475	290	342	188	433	2756
Endogenous	C1s1	NM_144938.2	287	126	182	230	108	540	266	325	964	172	407	425	446	1453	541	310	131	228	468	169	265	185	445	4138
Endogenous	C2	NM_013484.2	393	170	443	383	207	387	273	311	616	175	473	469	712	1186	537	317	178	184	558	196	448	316	469	926
Endogenous	C3	NM_009778.2	8580	4835	6975	4397	3237	5802	12370	12407	12511	6028	8095	10777	11974	20698	8311	6102	3262	6214	5450	4749	5378	2545	4880	19386
Endogenous	C3ar1	NM_009779.2	316	127	127	298	130	316	112	204	311	138	290	278	463	402	244	120	165	244	305	339	409	238	607	1800
Endogenous	C4b	NM_009780.2	730	569	788	670	352	994	1004	799	1918	346	1269	1631	2173	2562	1570	627	543	1081	1073	900	1157	644	1090	6746
Endogenous	C5ar1	NM_007577.3	371	125	157	310	195	811	393	585	696	406	899	863	982	913	451	761	173	304	289	291	445	398	1483	2392
Endogenous	C6	NM_016704.2	23	25	18	26	25	39	18	29	39	33	29	25	28	35	39	29	23	32	22	23	39	11	42	707
Endogenous	C7	XM_356827.6	13	15	7	11	6	13	3	11	10	9	11	15	15	12	8	3	4	18	6	12	15	7	13	27
Endogenous	C8a	NM_146148.2	17	10	8	9	12	11	8	10	13	13	13	13	15	18	14	8	12	5	14	12	11	12	10	19
Endogenous	C8b	NM_133882.2	22	12	18	35	15	24	8	11	16	11	14	13	12	17	14	11	11	15	29	22	24	15	14	69
Endogenous	C8g	NM_027062.1	20	25	27	40	23	23	19	21	26	8	18	30	37	33	23	13	16	17	39	29	24	21	22	21
Endogenous	C9	NM_013485.1	7	18	15	23	29	16	16	7	14	17	8	21	12	12	15	26	8	12	11	14	17	12	6	21
Endogenous	CD209e	NM_130905.2	7	15	9	18	26	28	10	11	16	16	7	14	10	19	15	14	12	14	32	17	16	9	12	15
Endogenous	Camp	NM_009921.2	17	11	12	16	19	12	20	16	15	11	29	27	19	38	11	11	14	13	21	18	19	9	38	25
Endogenous	Card11	NM_175362.2	48	36	67	66	32	49	30	67	80	27	206	212	266	184	136	37	164	142	247	230	223	410	327	447
Endogenous	Card9	NM_001037747.1	33	24	27	36	13	34	23	25	46	26	33	29	58	45	36	20	15	33	32	47	44	25	49	77
Endogenous	Casp1	NM_009807.2	144	132	306	111	40	312	302	344	506	154	756	619	627	942	462	276	263	302	352	268	291	839	747	1174
Endogenous	Casp3	NM_009810.2	2548	1646	2566	3013	1297	1689	1516	1556	1778	982	1368	1187	1663	2317	1411	895	1489	1420	2523	2574	2654	2562	2052	1446
Endogenous	Casp8	NM_009812.2	1845	1535	1847	1938	783	1212	1227	1225	1508	731	1116	1150	1493	2452	1206	655	1414	1641	1814	2997	2423	1637	1646	1767
Endogenous	Ccl1	NM_011329.2	15	70	56	51	16	128	128	468	200	94	409	120	147	304	280	150	21	23	38	29	46	341	200	176
Endogenous	Ccl11	NM_011330.3	221	60	73	211	104	197	40	38	194	52	54	85	65	59	103	62	76	120	124	118	133	33	128	1435
Endogenous	Ccl12	NM_011331.2	106	38	40	78	40	110	86	87	97	44	79	93	110	164	71	54	42	63	60	54	67	43	67	154
Endogenous	Ccl17	NM_011332.2	178	100	131	278	58	219	99	73	102	111	31	34	35	52	29	97	42	68	91	153	212	26	15	30
Endogenous	Ccl19	NM_011888.2	31	21	40	35	25	43	24	17	52	31	27	20	23	35	20	23	42	33	74	56	30	31	61	223
Endogenous	Ccl2	NM_011333.3	1173	463	397	1033	378	1888	794	876	1408	795	1387	1322	2094	2015	1241	393	967	1460	1060	1228	1510	1230	1840	5003
Endogenous	Ccl20	NM_016960.1	106	106	165	126	72	78	165	207	191	90	84	120	143	270	112	76	20	35	71	65	64	49	40	22
Endogenous	Ccl21a	NM_011124.4	41	45	192	51	51	48	59	104	33	58	109	56	44	265	56	51	33	56	187	54	37	70	56	39
Endogenous	Ccl22	NM_009137.2	99	58	59	104	58	89	49	62	64	56	66	35	46	82	53	58	24	31	44	46	89	18	37	24
Endogenous	Ccl24	NM_019577.4	197	26	76	253	63	1167	530	598	785	825	991	1043	1131	976	519	1361	44	64	70	334	441	121	483	124
Endogenous	Ccl25	NM_009138.3	283	286	208	274	99	203	237	328	180	150	123	232	241	228	151	172	202	262	171	302	208	124	140	129
Endogenous	Ccl26	NM_001013412.2	15	10	16	16	13	19	8	14	21	10	11	14	25	17	8	16	12	18	12	9	12	24	15	35
Endogenous	Ccl27a	NM_001048179.1	346	307	402	472	178	221	249	144	224	131	136	91	199	333	187	139	104	142	383	474	310	273	135	92
Endogenous	Ccl28	NM_020279.3	10	7	7	7	12	7	17	13	14	10	8	12	9	13	7	14	6	11	18	16	17	19	16	20
Endogenous	Ccl3	NM_011337.1	233	99	104	264	245	888	681	1210	1055	567	2833	3178	3731	2209	1531	1403	195	256	275	268	373	3229	7227	2511
Endogenous	Ccl4	NM_013652.1	33	15	20	57	32	189	155	323	213	137	866	1140	1243	765	503	360	41	49	57	40	64	1455	1658	1123
Endogenous	Ccl5	NM_013653.3	51	39	40	59	31	246	178	396	346	139	4606	5528	7023	2583	2184	421	2847	3563	2031	1350	1510	15347	11434	19096
Endogenous	Ccl6	NM_009139.2	330	227	160	236	164	1419	251	404	756	457	536	577	742	489	297	525	227	463	254	272	461	304	1260	4724
Endogenous	Ccl7	NM_013654.2	167	81	86	162	58	411	151	146	314	109	163	211	303	270	209	121	224	335	220	266	245	241	368	1026
Endogenous	Ccl8	NM_021443.2	271	165	78	137	83	773	129	244	715	157	464	342	545	643	424	188	143	208	218	233	282	139	387	3371
Endogenous	Ccl9	NM_011338.2	1471	614	616	967	667	2398	342	446	1260	1334	633	909	934	740	518	622	475	1244	746	748	1844	483	1951	12310
Endogenous	Ccnd3	NM_007632.2	766	541	751	795	340	373	425	409	490	228	426	444	678	964	640	274	620	587	744	903	639	858	618	562
Endogenous	Ccr1	NM_009912.4	177	77	88	127	78	629	389	702	635	300	1014	1046	1052	886	453	811	87	172	158	223	208	494	1869	464
Endogenous	Ccr2	NM_009915.2	453	206	145	323	127	756	302	406	623	322	1360	1533	1572	866	667	435	531	883	721	597	805	1918	2039	5305
Endogenous	Ccr3	NM_009914.4	9	8	6	22	15	49	16	38	44	42	48	51	42	29	34	33	9	11	12	35	13	17	72	43
Endogenous	Ccr4	NM_009916.2	20	11	18	23	25	16	20	21	24	21	26	27	35	21	22	22	19	51	14	32	18	19	16	60
Endogenous	Ccr5	NM_009917.5	229	102	82	101	83	287	123	174	303	156	668	757	971	661	469	174	491	452	563	478	601	1281	1235	2123
Endogenous	Ccr6	NM_001190333.1	19	12	12	21	19	9	9	21	25	19	19	16	16	18	19	15	2	12	64	15	21	14	18	20
Endogenous	Ccr7	NM_007719.2	76	35	66	84	49	71	56	84	76	46	128	43	79	162	74	53	26	36	73	67	82	63	90	61
Endogenous	Ccr8	NM_007720.2	46	23	56	63	48	38	33	54	36	38	37	47	36	70	51	46	16	36	45	66	51	70	48	18
Endogenous	Ccr9	NM_009913.6	25	15	21	27	23	18	15	27	24	27	29	31	47	29	28	20	29	50	58	31	37	25	62	93
Endogenous	Ccrl2	NM_017466.4	188	82	78	118	84	753	520	749	975	377	1740	1028	1307	1193	616	1142	60	100	153	145	200	690	2066	264
Endogenous	Cd14	NM_009841.3	2220	1771	2300	1934	1292	3140	2873	2817	3696	2199	1869	1938	2544	3501	1741	2791	971	1552	2261	2403	2225	1324	2595	1094
Endogenous	Cd160	NM_001163496.1	12	28	14	18	19	21	22	78	41	22	275	241	234	198	185	33	132	165	195	203	165	1191	571	656
Endogenous	Cd163	NM_053094.2	51	43	32	42	27	105	21	13	58	14	21	38	34	30	30	24	30	81	42	40	55	11	55	1308
Endogenous	Cd164	NM_016898.2	6778	2220	5079	6306	2872	2741	2122	2370	3326	1565	2505	2444	3214	5359	2631	1848	1855	2206	5540	3928	5494	3949	3912	3490
Endogenous	Cd180	NM_008533.2	85	49	82	70	34	128	100	121	225	60	366	203	350	370	210	95	64	129	232	126	177	165	376	1250
Endogenous	Cd19	NM_009844.2	14	9	19	10	13	7	12	19	10	11	11	13	14	20	11	7	7	14	54	15	18	15	14	17
Endogenous	Cd1d1	NM_007639.3	226	60	162	152	89	120	65	77	140	98	259	226	255	285	153	102	106	165	259	241	277	453	479	513
Endogenous	Cd1d2	NM_007640.2	29	14	26	29	36	16	17	28	25	28	21	20	23	24	21	45	13	17	30	29	34	13	14	25
Endogenous	Cd2	XM_006500959.1	18	16	13	20	21	20	10	38	37	21	120	93	132	106	84	18	108	94	271	105	176	378	307	357
Endogenous	Cd200	NM_010818.3	243	87	175	231	144	147	97	114	145	90	88	81	116	170	101	83	123	110	228	228	252	77	122	106
Endogenous	Cd200r1	NM_021325.3	105	37	48	61	32	99	35	58	74	51	102	81	76	147	66	45	40	58	93	87	101	64	141	387
Endogenous	Cd207	NM_144943.3	21	14	30	25	19	14	16	17	17	19	12	31	12	19	15	8	5	16	21	14	14	14	17	21
Endogenous	Cd22	NM_001043317.2	30	22	26	23	26	25	27	39	28	27	43	39	41	68	53	31	24	55	97	58	42	42	57	100
Endogenous	Cd244	NM_018729.2	175	96	140	148	92	264	243	390	381	204	697	549	663	644	411	251	121	121	300	302	240	289	436	219
Endogenous	Cd247	NM_001113391.2	33	35	38	41	48	59	49	109	75	70	340	345	465	246	206	76	227	265	264	210	257	988	817	910
Endogenous	Cd27	NM_001033126.2	9	7	12	12	16	12	15	34	23	9	142	119	204	110	99	7	113	82	106	80	87	500	369	430
Endogenous	Cd274	NM_021893.2	463	263	364	423	243	2534	3209	2673	3974	1621	6675	5924	6976	8380	4364	3840	462	580	834	915	851	3257	6981	978
Endogenous	Cd276	NM_133983.4	2381	915	2499	2403	1240	656	636	580	772	414	429	335	504	1444	718	285	914	725	2176	1201	2346	850	580	472
Endogenous	Cd28	NM_007642.4	49	42	80	72	83	59	41	43	45	43	75	67	61	75	70	62	42	59	79	65	88	131	152	92
Endogenous	Cd33	NM_001111058.1	165	62	88	107	69	380	248	432	401	235	344	262	321	361	163	372	43	116	160	109	130	106	314	248
Endogenous	Cd34	NM_001111059.1	882	414	683	699	345	1052	322	240	737	259	222	344	393	436	380	218	620	692	1255	944	1022	243	650	3093
Endogenous	Cd36	NM_007643.3	314	112	206	168	187	141	99	129	118	180	193	147	185	299	175	112	310	533	539	374	576	140	611	4325
Endogenous	Cd37	NM_007645.4	135	76	84	119	51	274	128	266	307	156	631	574	740	562	377	225	336	481	684	462	640	1593	1400	2506
Endogenous	Cd38	NM_007646.4	804	222	745	598	404	457	242	401	623	267	562	596	712	999	420	262	165	317	641	354	731	675	686	1873
Endogenous	Cd3d	NM_013487.2	32	39	25	46	32	52	51	212	115	63	1120	1094	1633	757	738	82	834	978	1059	881	950	5242	3971	4071
Endogenous	Cd3e	NM_007648.4	13	27	22	20	31	35	33	149	77	30	617	566	846	453	391	34	299	366	627	416	511	2888	2225	2051
Endogenous	Cd3eap	NM_145822.2	198	133	165	200	97	101	100	88	162	116	64	84	184	207	143	61	96	92	129	211	180	114	87	66
Endogenous	Cd3g	NM_009850.2	34	34	28	34	32	47	43	220	110	23	1374	1155	1671	929	710	54	498	891	1052	641	892	7111	4546	4282
Endogenous	Cd4	NM_013488.2	49	27	41	46	25	37	33	73	43	23	144	89	76	84	64	30	10	29	45	33	51	31	51	70
Endogenous	Cd40	NM_011611.2	51	44	56	66	23	84	65	52	98	45	132	112	120	160	74	86	30	50	78	57	60	79	87	130
Endogenous	Cd40lg	NM_011616.2	15	13	10	27	30	23	17	31	31	19	38	29	43	48	36	32	16	29	29	33	30	46	47	39
Endogenous	Cd44	NM_009851.2	93	85	123	133	61	56	78	69	82	56	64	53	80	124	64	51	56	55	134	114	113	87	60	73
Endogenous	Cd46	NM_010778.3	5	8	17	11	10	13	5	9	12	6	7	5	9	3	11	4	5	4	14	15	15	6	4	5
Endogenous	Cd47	NM_010581.3	3787	2146	4222	4214	2251	2430	2007	2249	3123	1484	3007	2455	3240	5735	2792	1623	2178	2270	4825	2943	4695	4269	4062	4440
Endogenous	Cd48	NM_007649.4	140	85	91	122	74	199	127	224	236	114	887	770	1250	620	543	169	576	673	854	510	839	2344	1933	3057
Endogenous	Cd5	NM_007650.3	13	24	18	24	9	17	25	66	34	28	253	264	366	200	153	22	280	378	380	265	305	1627	1238	1475
Endogenous	Cd53	NM_007651.3	94	44	69	99	69	122	69	145	138	88	207	205	246	244	148	142	58	87	145	114	130	241	465	263
Endogenous	Cd55	NM_010016.2	1107	1123	1472	1309	469	854	855	761	880	407	498	455	699	976	625	474	636	1022	1433	1414	1190	710	697	1124
Endogenous	Cd59b	NM_181858.1	48	26	56	50	48	34	34	36	51	29	17	21	24	36	32	32	22	28	48	58	38	29	22	30
Endogenous	Cd6	NM_001037801.2	21	11	12	12	15	21	16	56	35	18	141	152	221	141	102	17	183	214	275	278	253	994	748	823
Endogenous	Cd63	NM_001042580.1	11807	4758	11719	12044	6333	6562	4274	4313	6539	3542	3508	2914	5037	9187	4570	2899	3241	4038	12028	9436	11219	5258	4655	5486
Endogenous	Cd68	NM_009853.1	727	491	603	656	475	877	537	854	899	548	1298	1121	1466	1388	861	648	510	950	872	906	1080	1119	2228	5832
Endogenous	Cd69	NM_001033122.3	33	23	24	31	32	127	83	122	112	66	494	335	394	294	180	130	101	149	132	96	182	911	785	552
Endogenous	Cd7	NM_009854.1	14	21	19	26	17	26	30	111	52	24	370	389	350	217	174	41	98	183	168	155	127	1014	466	1009
Endogenous	Cd70	NM_011617.1	29	37	37	41	46	26	18	20	33	27	15	21	33	29	32	24	16	25	33	45	41	23	29	15
Endogenous	Cd74	NM_001042605.1	7290	5738	6586	8021	2962	13116	7321	15537	18755	5600	22705	18034	28097	35865	19090	9795	1792	5114	6351	8050	9651	13276	20643	42769
Endogenous	Cd79a	NM_007655.3	11	9	15	25	11	11	10	8	7	7	10	7	10	23	14	11	2	16	21	18	17	3	9	9
Endogenous	Cd79b	NM_008339.2	15	10	20	21	21	17	21	21	31	17	34	28	30	46	17	18	11	36	169	21	20	23	26	99
Endogenous	Cd80	NM_009855.2	261	118	125	189	101	484	279	513	450	300	503	394	553	486	318	485	245	283	417	328	402	815	983	759
Endogenous	Cd81	NM_133655.2	29161	16489	33002	30727	14511	16977	16525	13412	27623	9849	6764	8927	14801	26195	12629	10619	10407	11954	26018	29479	26257	8546	6748	6019
Endogenous	Cd83	NM_009856.2	132	72	98	129	78	109	72	156	149	71	117	75	113	193	113	119	30	52	131	94	94	52	83	129
Endogenous	Cd84	NM_001252472.1	260	120	165	172	106	317	195	289	361	145	607	512	705	658	425	230	296	343	459	520	511	706	1122	1622
Endogenous	Cd86	NM_019388.3	82	39	84	111	59	122	62	104	138	82	147	141	174	200	110	96	33	82	129	114	132	163	195	269
Endogenous	Cd8a	NM_001081110.2	7	17	24	25	16	19	13	89	60	21	536	416	727	473	358	13	241	329	545	327	428	2786	1867	1696
Endogenous	Cd8b1	NM_009858.2	17	11	16	25	12	10	10	24	17	14	200	144	320	145	107	14	157	194	292	114	191	1062	748	747
Endogenous	Cd9	NM_007657.3	8650	7640	14354	10896	6724	5697	6090	5758	5496	4236	4339	5117	6117	9456	4898	4095	6200	7035	13872	10166	12015	5787	5854	2370
Endogenous	Cd96	NM_032465.2	17	14	20	23	14	18	12	13	19	9	36	27	43	33	31	10	25	29	35	40	45	130	88	107
Endogenous	Cd97	NM_011925.1	2943	1339	3456	3849	1790	1934	1517	1559	2942	1412	1411	1589	2332	3156	1578	1269	1322	1321	2840	3369	4038	1494	1699	2012
Endogenous	Cd99	NM_025584.2	3805	2612	3779	5524	2157	2454	2898	2539	3185	1867	1735	2080	4185	3776	2746	1790	2259	2303	3300	4915	4216	2403	2408	1822
Endogenous	Cdh1	NM_009864.2	37843	38587	51118	44718	22151	20233	27056	23682	26667	14096	14054	17325	26539	40392	24166	16839	18318	26004	38862	45330	38339	19445	11877	6991
Endogenous	Cdh5	NM_009868.3	936	255	602	819	517	445	320	257	305	200	120	184	268	463	286	135	393	418	1160	999	1086	210	398	474
Endogenous	Cdk1	NM_007659.3	118	38	77	84	52	26	21	21	33	13	21	22	43	72	57	9	40	32	81	43	84	49	27	55
Endogenous	Cdkn1a	NM_007669.4	794	503	718	1289	551	793	520	842	1106	545	1301	875	1420	2044	963	836	630	487	1291	1391	1400	861	2600	1109
Endogenous	Ceacam1	NM_001039185.1	114	53	313	161	138	103	83	132	213	55	79	90	104	232	104	72	46	61	146	75	115	52	93	109
Endogenous	Cebpb	NM_009883.3	1571	1067	1547	1561	869	2203	1660	2098	2578	1318	2860	2499	2752	4126	1918	2090	1033	1185	1530	1875	1848	1584	4369	2087
Endogenous	Cfb	NM_008198.2	2593	1222	3106	2824	1504	1925	1771	1114	2709	845	1595	1300	1720	4055	1987	1319	1035	1099	3414	1792	2321	1778	1458	2070
Endogenous	Cfd	NM_013459.1	224	80	171	154	129	103	88	41	115	55	89	111	108	84	136	87	91	349	202	443	281	35	280	819
Endogenous	Cfh	NM_009888.3	1201	249	651	862	350	616	533	494	1013	246	253	397	657	815	451	305	346	457	802	651	662	107	251	1865
Endogenous	Cfi	NM_007686.2	2769	1186	3379	1796	1334	415	407	556	528	352	95	175	286	605	230	138	388	763	1547	886	1382	123	61	92
Endogenous	Cfp	NM_008823.3	435	234	319	476	209	589	182	271	458	269	383	389	493	471	262	282	191	402	456	468	549	224	623	3031
Endogenous	Chil3	NM_009892.2	74	44	22	62	85	234	119	87	158	183	745	657	387	283	203	293	412	847	132	172	163	1054	1532	4597
Endogenous	Chit1	NM_027979.1	5	11	8	16	16	12	18	15	20	17	17	19	21	7	12	19	11	12	11	12	18	20	14	21
Endogenous	Chuk	NM_001162410.1	2341	1826	2109	2034	837	997	1204	847	1305	653	918	836	1469	2329	1267	537	1500	1372	1945	3008	1978	1342	1115	904
Endogenous	Ciita	NM_007575.2	46	37	67	64	33	90	90	96	218	65	179	141	219	439	222	78	23	27	52	49	59	64	89	153
Endogenous	Cklf	NM_029295.2	540	509	522	618	268	466	456	388	432	354	289	334	628	525	363	281	319	431	461	790	557	413	427	400
Endogenous	Clec4a2	NM_001170332.1	85	49	38	75	34	111	51	47	76	63	126	87	121	131	65	53	42	138	95	78	99	71	215	898
Endogenous	Clec4n	NM_001190320.1	833	282	487	724	432	1104	527	939	955	927	1315	1206	1560	1442	776	898	197	333	522	845	1127	561	1583	617
Endogenous	Clec5a	NM_001038604.1	124	75	61	85	50	793	377	769	728	371	830	943	934	750	368	741	41	130	68	140	163	289	991	306
Endogenous	Clec7a	NM_020008.2	526	243	374	432	258	2939	1367	2122	2279	1543	5338	3678	4334	4233	1915	3073	108	329	376	498	988	1476	4182	1038
Endogenous	Clu	NM_013492.2	387718	260362	475110	408037	220932	154450	187713	207229	158241	119111	66681	75869	114096	187743	111759	104724	161615	253907	519635	381340	426233	142218	95545	55374
Endogenous	Cma1	NM_010780.2	140	52	111	52	34	37	66	49	48	32	67	38	44	80	40	21	18	23	26	46	62	35	46	153
Endogenous	Cmah	NM_001111110.2	82	58	63	79	38	174	40	52	140	39	166	142	214	126	98	41	374	356	437	278	309	602	577	1258
Endogenous	Cmklr1	NM_008153.3	294	128	179	186	142	230	121	117	215	119	241	236	345	307	242	136	119	208	263	297	334	206	364	868
Endogenous	Cmpk2	NM_020557.4	36	31	29	37	52	214	105	155	212	77	325	210	233	253	143	196	26	47	71	44	65	127	272	180
Endogenous	Col1a1	NM_007742.3	23359	5442	21329	18978	7989	16537	5444	5044	12666	3570	3335	4777	6863	11364	6190	3668	12327	6944	24191	12835	15686	4831	8375	25659
Endogenous	Col3a1	NM_009930.1	19862	4641	11755	12542	5445	27138	2291	2964	16017	2600	2308	5681	3197	4708	3595	3729	8292	6257	18979	11593	12111	1592	6751	64608
Endogenous	Col4a1	NM_009931.2	13552	8153	11877	13115	5939	5355	6724	5078	6089	3731	2276	3815	6433	7955	5097	2511	7819	7068	8116	15021	10930	3817	3888	3743
Endogenous	Colec12	NM_130449.2	205	43	172	179	80	131	53	61	109	42	44	55	50	125	55	42	108	117	364	218	183	46	121	389
Endogenous	Cr2	NM_007758.2	13	11	16	22	8	12	10	14	13	12	17	14	26	32	17	8	9	18	18	16	16	17	22	39
Endogenous	Creb1	NM_001037726.1	543	204	372	465	172	225	174	234	246	141	208	189	284	379	232	130	151	214	397	377	401	386	305	273
Endogenous	Creb5	NM_172728.2	243	83	172	213	134	114	88	148	139	64	106	137	122	209	104	106	80	68	210	140	194	74	140	152
Endogenous	Crebbp	NM_001025432.1	3165	1089	2422	2853	1210	965	839	873	1358	622	794	737	1145	1998	928	545	847	886	2385	1931	2426	1408	1216	1340
Endogenous	Crp	NM_007768.4	177	33	116	82	78	14	19	32	21	18	10	13	12	31	12	14	11	41	48	58	44	13	8	20
Endogenous	Csf1	NM_001113530.1	1251	658	711	807	468	1386	1304	1824	1766	960	2273	1916	2509	3115	1502	1686	705	722	995	787	970	1061	2588	1458
Endogenous	Csf1r	NM_001037859.2	711	312	384	537	275	633	396	567	664	349	714	673	1026	886	635	449	349	624	574	844	859	506	1097	3106
Endogenous	Csf2	NM_009969.4	293	101	87	247	47	219	76	101	249	102	115	104	196	322	103	55	161	76	103	254	294	80	84	40
Endogenous	Csf2rb	NM_007780.4	413	165	256	413	203	1006	512	809	991	480	884	894	1034	1078	548	1049	141	189	408	484	598	338	1072	602
Endogenous	Csf3	NM_009971.1	37	29	36	50	30	65	46	75	104	71	20	25	35	111	38	55	19	25	35	29	33	10	28	16
Endogenous	Csf3r	NM_001252651.1	266	116	152	149	117	968	635	1150	1171	511	1364	1212	1434	1449	640	965	86	145	187	206	253	327	989	369
Endogenous	Cspg4	NM_139001.2	260	75	224	291	126	68	57	47	94	37	21	32	57	124	45	22	62	81	266	184	217	34	56	34
Endogenous	Ctla4	NM_009843.3	25	32	38	37	41	65	48	145	87	66	586	573	575	438	312	63	160	192	299	199	308	2303	2455	1354
Endogenous	Ctsg	NM_007800.1	8	13	9	11	13	7	11	7	13	14	16	9	11	13	9	3	4	14	8	13	9	7	6	12
Endogenous	Ctsh	NM_007801.2	9237	5572	12238	10043	5501	4572	3779	3842	5191	2599	2931	2699	5114	6742	4025	2224	2832	3538	7300	6761	7870	3594	3890	6722
Endogenous	Ctsl	NM_009984.3	3307	1034	2510	4248	1719	1289	877	926	1405	775	673	607	965	1896	838	649	914	916	3024	1763	3368	1083	1255	2414
Endogenous	Ctss	NM_021281.2	2312	1263	1608	1780	1143	5103	2355	4251	4705	2583	7433	6830	8489	7675	4729	4268	1030	2346	2442	2430	3598	4466	9016	17572
Endogenous	Ctsw	NM_009985.4	247	174	269	264	126	121	165	245	214	108	1144	1008	1416	1001	848	135	1409	1606	2135	2431	1859	6141	3503	4023
Endogenous	Cx3cl1	NM_009142.3	356	316	631	505	253	385	409	315	659	181	259	299	332	865	335	289	163	210	466	316	401	244	180	102
Endogenous	Cx3cr1	NM_009987.3	254	115	174	158	123	122	89	169	115	74	216	147	264	239	189	61	141	250	272	167	230	677	398	602
Endogenous	Cxcl1	NM_008176.1	155	60	65	99	37	68	59	92	120	66	85	89	130	350	96	21	40	37	67	30	68	41	54	139
Endogenous	Cxcl10	NM_021274.1	158	132	175	249	152	5287	6218	3820	9147	2515	5689	7014	8284	12385	6041	6136	94	68	189	176	229	2242	1667	883
Endogenous	Cxcl11	NM_019494.1	36	63	26	47	43	649	916	594	1229	269	1325	1477	1569	1825	1260	941	31	49	72	76	58	663	454	202
Endogenous	Cxcl12	NM_021704.3	684	275	340	353	176	678	221	258	566	158	447	441	591	501	451	185	1064	860	792	924	679	431	1409	6086
Endogenous	Cxcl13	NM_018866.2	12	46	5	19	20	40	14	16	23	16	16	11	13	11	10	11	24	54	93	20	15	11	26	474
Endogenous	Cxcl14	XM_006517307.1	1898	606	624	1191	625	1866	1062	1507	1471	970	544	1492	1690	1698	1173	1506	1989	2507	2264	2190	1860	832	1492	1486
Endogenous	Cxcl15	NM_011339.2	59	22	49	35	30	17	10	13	21	18	11	13	21	41	18	13	14	20	34	25	26	18	32	20
Endogenous	Cxcl16	NM_023158.6	2794	1864	3149	2817	1626	2065	1948	1745	2222	922	1889	1586	2063	3717	2127	1317	1436	1718	4241	2786	2708	2491	2360	1471
Endogenous	Cxcl2	NM_009140.2	292	112	94	160	144	1078	542	708	1188	518	1336	896	1166	1252	641	1196	136	126	191	150	263	1193	5879	578
Endogenous	Cxcl3	NM_203320.2	501	209	259	450	311	1769	1317	1781	2480	1546	2927	4174	3620	3422	1933	2900	165	265	276	784	1027	886	4583	470
Endogenous	Cxcl5	NM_009141.2	4604	1914	5111	3727	2480	13710	11175	10482	24582	7283	5525	7541	9133	21234	6389	9298	1208	1436	3127	1501	3250	1671	1447	715
Endogenous	Cxcl9	NM_008599.2	18	107	72	75	20	2730	2998	1984	6429	1102	2926	3033	3831	6760	2845	2285	31	20	67	41	79	1171	1016	399
Endogenous	Cxcr1	NM_178241.4	9	12	7	16	18	17	15	20	21	10	15	23	16	14	21	19	8	11	11	10	13	12	26	24
Endogenous	Cxcr2	NM_009909.3	166	120	115	85	85	1514	1045	1861	1612	728	1669	1510	1422	1598	582	1672	81	146	114	130	116	450	1306	304
Endogenous	Cxcr3	NM_009910.2	25	27	35	24	42	35	42	59	46	38	267	265	369	160	174	35	700	636	617	510	658	1737	1210	2223
Endogenous	Cxcr4	NM_009911.3	444	223	384	338	263	1190	801	1472	1173	623	2166	1423	1970	1678	831	1362	271	403	548	484	650	1026	1861	811
Endogenous	Cxcr5	NM_007551.2	5	6	7	16	12	13	6	15	13	13	12	16	21	19	16	13	3	10	30	9	10	13	19	23
Endogenous	Cxcr6	NM_030712.4	23	32	33	43	19	38	27	161	70	38	1065	1020	1569	771	729	46	587	900	1203	673	1042	6929	4406	4588
Endogenous	Cybb	NM_007807.2	765	387	744	560	340	821	583	884	1038	646	1371	1205	1479	2413	1053	677	254	531	668	568	883	654	1179	2938
Endogenous	Cyfip2	NM_001252459.1	48	41	51	48	33	117	91	197	198	68	723	595	798	548	348	165	360	348	557	574	516	1659	1451	1356
Endogenous	Cyld	NM_001276279.1	568	512	567	553	317	273	471	436	394	244	569	505	561	706	560	333	489	638	697	549	662	1077	824	884
Endogenous	Ddx58	NM_172689.3	489	420	480	404	191	741	765	633	1014	320	942	894	1050	1545	871	576	469	538	680	653	629	958	938	786
Endogenous	Ddx60	NM_001081215.1	92	70	86	75	53	221	216	169	515	120	438	336	500	965	439	210	85	98	243	125	225	223	471	316
Endogenous	Defb1	NM_007843.3	8	10	4	16	23	14	14	16	12	15	7	16	23	8	11	20	8	16	17	13	17	9	18	20
Endogenous	Dll4	NM_019454.2	598	367	520	677	243	417	335	397	398	329	119	211	363	445	255	161	499	490	549	1376	1076	222	322	198
Endogenous	Dmbt1	XM_006507298.1	12759	7568	18781	9124	6923	1657	6040	10829	6180	2336	1749	5082	6206	13652	4665	2440	917	3746	4881	1937	7856	717	178	156
Endogenous	Dock9	XM_976068.1	1306	1094	1093	1466	525	748	924	842	1010	610	550	730	1064	1162	706	553	833	975	968	1850	1314	753	777	707
Endogenous	Dpp4	NM_001159543.1	133	93	89	114	44	178	62	74	209	44	163	163	243	237	168	65	304	306	427	582	413	713	517	1252
Endogenous	Dusp4	NM_176933.4	3432	1829	3506	3866	1634	1529	1889	1482	2051	991	1053	956	1384	2721	1559	837	1491	1436	4125	4077	3766	1649	1377	417
Endogenous	Dusp6	NM_026268.2	5054	3149	4837	6234	2429	3962	3620	3325	6268	2433	3609	3047	4804	8229	4877	2599	3082	2705	5320	5362	7246	4673	4248	1955
Endogenous	Ebi3	NM_015766.2	45	25	38	36	35	81	52	99	68	47	150	139	135	122	69	88	25	54	61	58	56	57	101	233
Endogenous	Ecsit	NM_001253897.1	142	129	139	166	79	76	94	95	105	65	117	95	128	198	96	56	140	123	181	198	170	201	156	150
Endogenous	Egfr	NM_207655.2	1793	1160	2225	2154	1092	1178	1196	1247	1867	739	554	882	1333	1929	947	651	922	1189	1958	2678	2052	733	607	958
Endogenous	Egr1	NM_007913.5	1923	1590	1503	1584	787	2679	2010	1763	2343	1139	2539	1753	2087	3462	1645	1441	1527	1740	1783	2762	1961	3051	3768	1863
Endogenous	Egr2	NM_010118.2	53	31	50	49	28	48	19	44	51	27	41	50	76	73	55	37	32	41	55	66	115	42	85	63
Endogenous	Egr3	NM_018781.2	125	92	128	98	46	84	67	92	89	57	168	150	172	189	106	64	86	79	116	145	153	260	347	205
Endogenous	Elane	NM_015779.2	7	10	12	12	11	9	11	14	6	9	7	9	7	16	11	8	11	18	15	15	11	15	11	18
Endogenous	Elk1	NM_007922.4	283	98	236	256	97	45	47	43	94	64	28	30	64	121	56	25	49	46	190	219	159	46	29	37
Endogenous	Emr1	NM_010130.1	282	173	162	169	103	525	199	342	357	192	455	374	401	411	256	281	220	601	391	228	339	302	696	6313
Endogenous	Eng	NM_001146350.1	434	274	455	442	222	389	289	227	322	191	208	211	330	484	319	142	588	538	778	1084	692	312	566	850
Endogenous	Entpd1	NM_009848.3	181	73	134	132	81	262	186	295	266	165	404	332	416	464	220	294	66	94	193	113	167	260	521	388
Endogenous	Eomes	NM_010136.2	10	18	15	14	25	25	26	43	26	31	157	143	189	81	86	52	63	68	59	46	46	94	127	201
Endogenous	Ep300	NM_177821.6	2737	1355	2295	2549	983	1013	1095	1048	1385	744	781	857	1404	2182	1091	568	1172	1264	2202	3189	2527	1221	1137	1157
Endogenous	Epcam	NM_008532.2	6022	1842	7988	8453	4102	2718	2750	2164	3187	935	970	620	1008	3579	1321	1587	933	1314	6331	2864	4893	1995	1417	560
Endogenous	Epsti1	NM_029495.2	5	8	10	10	5	8	4	7	7	5	10	6	16	14	4	13	3	6	13	6	13	16	10	9
Endogenous	Erbb2	NM_001003817.1	3200	2612	4751	3466	1987	1011	1802	1549	1586	927	579	803	1129	2678	1282	674	1436	1794	3810	4008	3293	960	647	494
Endogenous	Ets1	NM_001038642.1	3221	1542	2195	3190	1181	1467	1388	1463	1929	1204	3008	2832	4386	3745	2585	757	2633	2504	3899	4676	4784	7557	6452	5772
Endogenous	Ewsr1	NM_007968.3	6632	3555	5651	5763	2563	2364	2523	2186	3462	1789	2002	1896	2934	4991	2744	1279	3189	2867	5395	6575	6001	3164	2881	2578
Endogenous	F12	NM_021489.2	9	8	14	8	15	6	10	8	9	11	9	8	18	18	9	3	9	8	12	18	11	8	10	9
Endogenous	F13a1	NM_001166391.1	262	245	68	153	88	600	94	67	341	96	193	331	317	189	199	111	365	711	313	254	292	287	1057	8069
Endogenous	F2rl1	NM_007974.4	2885	1245	3961	4069	2238	781	1017	887	1120	567	628	471	883	2332	1193	459	1301	988	3711	1782	3551	1285	767	486
Endogenous	Fadd	NM_010175.5	162	61	139	159	83	87	71	57	87	43	47	59	60	151	73	42	49	64	137	93	137	101	72	93
Endogenous	Fap	NM_007986.2	450	96	211	288	109	195	61	49	177	60	46	57	90	138	67	53	131	161	277	296	235	45	74	459
Endogenous	Fas	NM_007987.2	328	147	237	280	147	840	747	698	1108	633	975	1111	1577	2346	859	736	149	232	243	485	376	362	533	466
Endogenous	Fasl	NM_010177.3	11	10	15	8	10	18	22	40	24	21	152	127	191	134	108	25	75	87	119	109	108	452	321	263
Endogenous	Fcer1a	NM_010184.1	69	40	52	45	44	38	53	57	48	51	75	50	50	79	52	52	27	35	35	43	47	42	35	128
Endogenous	Fcer1g	NM_010185.4	587	305	322	446	250	1313	768	1382	1512	711	2013	1954	2273	2159	1055	1209	264	534	461	664	724	854	2185	2692
Endogenous	Fcer2a	NM_001253737.1	17	9	16	11	16	14	8	6	12	20	13	8	17	16	4	12	6	8	18	12	11	13	13	12
Endogenous	Fcgr1	NM_010186.5	204	126	122	168	90	432	206	262	366	158	507	526	592	558	301	282	120	249	181	189	247	280	660	1342
Endogenous	Fcgr2b	NM_001077189.1	2613	1089	1178	1657	830	3541	1038	1702	2278	1640	3549	3138	3557	3432	1888	1877	947	1729	1903	1411	2617	1736	4436	10367
Endogenous	Fcgr3	NM_010188.5	160	91	87	93	87	602	275	478	511	296	740	740	735	694	357	513	82	172	146	115	230	322	998	1101
Endogenous	Fcgr4	NM_144559.1	238	112	155	166	114	2121	1415	1844	2476	879	3540	3425	3507	3502	1577	2226	193	385	287	224	351	920	2584	2868
Endogenous	Fez1	NM_183171.4	22	9	21	18	15	17	10	13	16	5	7	10	11	18	14	9	19	14	22	12	22	18	28	65
Endogenous	Flt3	NM_010229.2	23	11	23	27	13	16	11	25	18	15	29	13	22	37	20	17	7	20	19	20	29	13	17	32
Endogenous	Flt3l	NM_013520.2	138	170	158	137	54	170	277	209	290	117	359	403	489	432	358	178	240	325	276	373	269	718	497	585
Endogenous	Fn1	NM_010233.1	48975	13531	40334	51975	29751	12952	10074	9091	15614	12417	4054	6246	9438	22405	8131	4572	10843	10665	44388	34521	50386	3597	7415	10407
Endogenous	Fos	NM_010234.2	7397	8636	8101	4481	1678	7121	4573	3610	6023	2069	5376	2353	3221	10133	3396	2226	4699	5881	6022	7578	6980	7338	7170	10558
Endogenous	Foxj1	NM_008240.3	71	57	78	57	34	11	22	21	19	28	6	13	23	40	21	14	21	24	54	44	63	18	14	20
Endogenous	Foxp3	NM_054039.2	25	16	15	24	9	25	11	57	35	19	69	65	68	108	95	16	5	4	9	28	29	16	18	15
Endogenous	Fpr2	NM_008039.2	97	35	81	99	61	521	321	439	744	294	1120	1055	951	925	442	672	35	93	92	103	154	336	1603	379
Endogenous	Fut7	NM_001177367.1	13	12	17	25	18	20	15	19	23	20	30	14	43	42	29	18	21	26	36	45	29	134	66	86
Endogenous	Fyn	NM_008054.2	174	106	165	140	69	177	126	178	197	78	560	609	759	561	405	121	530	587	796	574	665	1722	1531	2190
Endogenous	Gata3	NM_008091.3	93	48	81	70	46	40	45	67	70	51	133	107	173	152	87	39	105	107	122	143	132	296	262	259
Endogenous	Gbp2b	NM_010259.2	5	9	16	19	16	37	50	69	152	19	134	81	106	159	89	55	7	10	12	18	18	14	31	79
Endogenous	Gbp5	NM_153564.2	66	85	83	81	29	1746	2003	1548	2624	820	2948	2982	2949	5828	1955	2233	53	86	116	113	115	818	1065	382
Endogenous	Gfi1	NM_010278.2	46	30	49	42	38	34	38	33	68	34	75	57	113	87	54	51	61	74	104	122	91	169	150	139
Endogenous	Glycam1	NM_008134.2	9	13	10	19	14	9	15	9	16	10	10	9	11	16	17	8	18	13	56	19	14	17	18	20
Endogenous	Gpi1	NM_008155.4	6469	3346	6662	6862	3457	3562	3225	4168	4119	2420	4126	4019	4915	7888	3926	2547	3822	3401	7927	7271	8466	6763	7483	5751
Endogenous	Gpr183	NM_183031.2	24	20	20	33	19	30	17	29	35	24	73	57	90	72	48	27	66	73	126	101	98	282	284	213
Endogenous	Gpr44	XM_006526695.1	18	20	24	24	31	27	26	26	33	29	18	27	22	35	36	32	14	26	16	23	29	21	26	25
Endogenous	Gtf3c1	NM_207239.1	2072	1477	2473	2069	971	808	944	711	934	483	543	575	726	1644	861	424	1366	1234	2444	2547	2152	1086	908	782
Endogenous	Gzma	NM_010370.2	47	46	81	53	40	296	375	823	784	241	14518	11451	14957	6462	5015	933	650	780	2093	1196	1308	18075	9767	3352
Endogenous	Gzmb	NM_013542.2	20	11	20	17	12	60	73	163	108	49	2169	2992	4127	1484	1005	118	248	254	373	193	348	3291	2525	1240
Endogenous	Gzmk	NM_008196.1	9	6	11	16	11	10	13	29	32	8	952	855	1485	400	472	6	700	856	747	440	654	5530	3375	4124
Endogenous	Gzmm	NM_008504.2	26	31	28	22	14	26	16	24	16	15	45	34	43	31	34	15	26	34	34	31	39	35	37	66
Endogenous	H2-Aa	NM_010378.2	3697	2603	2837	3530	1392	6763	3028	6807	6979	2662	10212	7540	10260	12218	6586	4789	750	2637	2878	3142	3835	4448	9982	28934
Endogenous	H2-Ab1	NM_207105.2	3035	2630	2535	3220	1222	5846	3258	6758	6968	2557	9395	7323	10774	11281	7324	4273	816	2345	2311	3204	3624	4391	8642	19429
Endogenous	H2-D1	NM_010380.3	2631	2177	4533	3300	1435	4694	3526	6401	10412	2219	12852	9413	14106	27110	13025	4527	5018	5073	15649	7890	14430	16926	17097	20993
Endogenous	H2-DMb1	NM_010387.2	189	133	255	184	68	275	173	296	397	119	401	299	430	863	372	181	58	118	253	157	261	285	369	635
Endogenous	H2-DMb2	NM_010388.4	87	60	90	74	37	99	64	85	93	41	104	85	97	235	95	61	33	50	150	74	96	51	52	53
Endogenous	H2-Dma	NM_010386.3	330	192	258	357	171	629	349	610	746	302	982	794	1057	1235	643	468	127	276	296	266	371	407	749	1511
Endogenous	H2-Ea-ps	NM_010381.2	16	19	19	24	19	3	8	11	11	9	7	7	14	8	15	8	5	12	23	21	23	12	11	10
Endogenous	H2-Eb1	NM_010382.2	1416	1184	1411	1589	646	2367	1424	2951	3012	1188	4671	3215	5487	6192	3861	1835	500	1285	1362	1487	1961	2443	5719	12018
Endogenous	H2-K1	NM_001001892.2	2132	2923	4563	2860	940	3952	4045	8306	9974	1781	17798	12619	18091	35501	17970	4498	9066	8014	19560	12213	16419	26939	23570	26931
Endogenous	H2-M3	NM_013819.2	205	81	152	155	69	152	119	135	404	97	340	319	518	783	369	99	140	134	339	242	268	487	515	664
Endogenous	H2-Ob	NM_010389.3	123	53	122	135	88	53	54	50	71	68	32	42	63	96	46	53	40	65	159	94	135	25	33	68
Endogenous	H2-Q1	NM_010390.3	8	9	8	14	11	11	9	13	13	11	9	8	15	18	8	7	3	8	13	17	12	16	7	12
Endogenous	H2-Q10	NM_010391.4	87	58	69	50	53	406	287	504	459	240	298	305	419	377	157	461	55	91	78	97	97	154	280	172
Endogenous	H2-Q2	NM_010392.2	8	12	20	20	23	17	27	22	20	22	29	31	29	32	23	25	10	18	16	24	21	23	39	31
Endogenous	H2-T23	NM_010398.3	4416	3913	5564	5563	2696	8356	10026	9078	17616	5299	12889	15109	19911	30565	14797	7487	3042	4286	7594	9234	8362	10976	9686	7924
Endogenous	H60a	NM_010400.2	15	16	16	17	28	16	16	23	26	24	15	20	17	26	23	23	10	18	12	15	22	16	16	14
Endogenous	Hamp	NM_032541.1	14	10	15	14	20	9	9	12	8	10	10	19	12	15	12	16	5	14	10	17	24	8	13	13
Endogenous	Havcr2	NM_134250.2	53	27	38	47	22	79	51	123	90	42	320	321	462	270	229	106	54	93	134	86	102	908	721	524
Endogenous	Hc	NM_010406.1	68	31	116	62	34	16	37	34	30	24	27	22	32	73	20	14	29	31	64	47	63	18	19	15
Endogenous	Hck	NM_010407.3	113	75	73	92	60	341	216	276	344	155	589	480	501	502	242	346	64	140	122	126	157	201	458	654
Endogenous	Hcst	NM_011827.3	15	16	27	26	18	35	32	44	63	36	140	119	180	131	98	31	129	142	205	172	147	454	366	500
Endogenous	Herc6	NM_025992.2	114	67	129	73	49	333	266	266	428	144	640	543	520	805	394	418	101	111	174	111	144	537	580	332
Endogenous	Hif1a	NM_010431.2	7419	3108	4520	7353	2963	5672	3277	4246	6579	3357	4278	4496	5268	10565	4073	3540	3785	3462	6980	8211	7859	5730	6617	4510
Endogenous	Hmgb1	NM_010439.3	1773	799	1424	1805	708	1091	860	838	824	568	825	815	935	1422	760	593	756	1063	1434	1094	1751	1946	1523	1753
Endogenous	Hras	NM_008284.2	87	49	80	96	52	32	54	29	53	51	37	35	98	57	63	44	53	55	102	98	92	35	36	17
Endogenous	Hsd11b1	NM_008288.2	127	48	46	95	25	255	83	168	254	106	505	455	525	372	215	187	138	180	266	177	232	576	863	915
Endogenous	Hspb2	NM_024441.3	26	32	30	23	29	22	26	30	31	32	19	17	26	31	38	14	31	20	31	42	35	18	22	32
Endogenous	Icam1	NM_010493.2	1098	740	1349	885	584	1445	1446	1041	1923	705	1406	1542	1299	2993	1127	1878	563	579	1614	833	985	1238	1101	788
Endogenous	Icam2	NM_010494.1	253	142	223	214	139	180	192	159	116	103	179	220	298	261	183	81	348	338	483	533	487	378	436	573
Endogenous	Icam4	NM_023892.2	62	37	77	68	43	31	45	29	46	29	26	23	42	56	42	29	26	28	45	66	61	32	29	19
Endogenous	Icos	NM_017480.1	49	23	36	36	20	39	30	127	72	62	440	520	669	341	300	45	155	149	267	192	243	2065	1523	862
Endogenous	Icosl	NM_015790.3	289	149	317	263	176	270	267	282	390	175	286	294	439	506	242	229	92	107	232	282	223	156	290	170
Endogenous	Ido1	NM_008324.1	33	27	32	46	36	274	248	330	1011	163	1008	1167	1502	1950	1320	278	34	33	36	73	83	864	521	129
Endogenous	Ifi27	NM_026790.2	1057	955	934	846	501	466	830	1076	783	534	772	1028	1373	1711	948	403	654	1078	824	1192	1176	1107	1153	1671
Endogenous	Ifi35	NM_027320.4	424	438	490	454	206	972	917	823	1119	397	1185	1145	1163	2019	1072	699	419	460	557	602	616	1406	1213	942
Endogenous	Ifi44	NM_133871.2	53	47	70	53	46	144	163	140	257	70	501	456	448	832	411	147	40	71	210	91	171	228	282	111
Endogenous	Ifi44l	NM_031367.1	12	8	12	22	11	14	7	7	11	16	5	11	12	21	8	8	6	10	11	15	22	12	14	30
Endogenous	Ifih1	NM_027835.2	334	309	344	267	133	701	619	594	798	317	867	720	829	1307	707	637	270	425	429	407	430	772	869	647
Endogenous	Ifit1	NM_008331.2	73	79	100	84	90	225	187	179	335	101	395	252	259	510	254	256	49	63	170	61	189	148	365	93
Endogenous	Ifit2	NM_008332.2	162	114	129	122	89	396	369	390	589	163	1075	592	686	1050	612	392	206	183	238	245	260	591	798	373
Endogenous	Ifit3	NM_010501.1	135	82	148	169	167	747	1019	940	1849	619	2522	2009	2819	3590	2102	1147	133	147	371	191	549	678	1444	290
Endogenous	Ifitm1	NM_001112715.1	76	43	86	115	53	625	543	838	873	325	1435	959	1106	1037	548	629	50	83	106	110	112	651	919	262
Endogenous	Ifitm2	NM_030694.1	9730	4570	9262	9979	4371	6933	5199	5960	7615	3659	5080	4571	5952	9795	4486	3730	3631	3695	6555	8522	8296	3649	4767	6982
Endogenous	Ifna1	NM_010502.2	19	16	28	21	36	20	21	20	21	57	22	24	22	29	32	33	17	18	21	29	23	16	27	11
Endogenous	Ifna2	NM_010503.2	8	7	9	11	9	6	8	6	11	13	8	6	7	9	5	6	2	12	14	11	7	18	11	15
Endogenous	Ifna4	NM_010504.2	16	11	12	20	31	9	15	12	18	20	11	16	16	20	14	16	12	17	14	15	17	13	14	18
Endogenous	Ifnar1	NM_010508.1	3958	2643	4306	3918	1852	1958	2053	2163	2432	1504	1617	1763	2400	4360	1925	1105	2222	2526	4599	4849	4378	2735	2520	3015
Endogenous	Ifnar2	NM_001110498.1	1181	541	1096	1092	598	649	591	631	769	401	740	687	954	1332	592	466	501	624	1190	771	1082	867	1114	1756
Endogenous	Ifnb1	NM_010510.1	12	9	12	16	17	12	4	8	14	8	19	10	16	22	12	6	7	21	22	15	20	15	11	12
Endogenous	Ifng	NM_008337.1	12	14	8	15	29	23	40	50	34	35	335	309	285	230	158	63	34	48	24	37	39	667	373	386
Endogenous	Ifngr1	NM_010511.2	7795	2697	7028	8404	4055	2643	2166	2442	4111	1751	3470	3450	5216	6441	3297	1386	2618	2980	7112	4431	8414	6768	5593	6931
Endogenous	Ifnl2	NM_001024673.2	12	14	25	18	9	14	8	9	8	14	9	9	12	12	19	8	9	10	16	7	15	13	9	13
Endogenous	Igf1r	NM_010513.2	1310	620	1124	1409	749	392	465	395	568	401	282	273	526	959	515	178	547	469	1329	1536	1357	362	428	231
Endogenous	Igf2r	NM_010515.1	1077	357	1152	1098	647	285	234	270	400	228	275	351	503	761	341	162	323	267	1487	736	1192	509	567	813
Endogenous	Igll1	NM_001190325.1	23	11	18	21	19	12	7	13	17	15	8	13	13	19	14	5	9	8	21	17	16	12	13	29
Endogenous	Ikbkb	NM_010546.2	3779	4007	3786	3807	1516	3784	4628	4685	3323	2622	3802	4443	5341	4418	3972	3952	3813	4820	3576	5823	4054	5158	4657	4045
Endogenous	Ikbke	NM_019777.3	1710	2402	1974	1869	809	2404	2750	2993	3057	1710	2285	3089	3667	3462	2405	2570	1535	2485	1394	3010	1833	2018	2065	1795
Endogenous	Ikbkg	NM_178590.2	1201	1369	1244	1119	497	892	1146	1154	940	717	729	1039	1170	1243	936	759	860	1267	917	1697	1185	828	878	768
Endogenous	Ikzf1	NM_001025597.1	42	33	21	57	29	77	64	98	99	55	288	281	381	219	161	53	109	170	203	133	188	660	635	655
Endogenous	Ikzf2	NM_011770.4	494	287	411	379	187	112	184	263	197	157	316	305	325	593	291	80	167	191	308	397	439	273	264	139
Endogenous	Il10	NM_010548.1	10	16	12	14	15	21	14	17	17	11	29	30	31	24	18	16	9	20	8	12	12	26	24	89
Endogenous	Il10ra	NM_008348.2	134	102	91	86	63	269	209	252	306	138	457	451	510	462	313	286	315	360	297	234	265	836	905	1610
Endogenous	Il11	NM_008350.2	93	39	52	81	39	26	22	44	16	44	16	22	61	29	27	19	39	36	42	220	65	11	29	21
Endogenous	Il11ra1	NM_010549.3	141	80	89	106	63	80	63	53	101	58	45	44	84	60	69	51	94	87	98	126	110	47	55	142
Endogenous	Il12a	NM_008351.1	11	17	13	15	31	15	17	19	20	22	17	26	18	21	19	20	22	18	20	20	22	23	21	24
Endogenous	Il12b	NM_008352.1	13	17	22	37	16	29	14	27	16	11	19	14	7	31	23	15	6	11	25	14	25	14	24	15
Endogenous	Il12rb1	NM_008353.2	38	47	38	51	24	64	157	125	153	80	216	290	378	447	183	45	100	80	88	113	97	209	182	221
Endogenous	Il12rb2	NM_008354.3	11	5	12	14	9	24	20	25	30	16	170	119	154	105	75	29	51	52	81	73	86	376	317	232
Endogenous	Il13	NM_008355.2	13	12	18	23	16	19	11	21	36	19	18	19	25	30	18	27	11	15	17	15	22	17	17	18
Endogenous	Il13ra1	NM_133990.4	1987	519	1136	1217	750	1687	1155	1428	1835	867	1604	1674	2031	3156	1317	1288	701	751	1612	1463	1986	981	1803	1009
Endogenous	Il13ra2	NM_008356.3	14	8	20	21	18	35	13	24	23	19	15	16	20	39	17	8	8	20	17	13	26	14	13	35
Endogenous	Il15	NM_008357.2	97	62	103	91	43	93	63	69	96	51	62	48	78	117	55	59	38	45	80	98	81	32	106	55
Endogenous	Il15ra	NM_008358.2	28	20	30	29	20	41	64	45	84	23	78	93	86	166	112	34	46	38	43	52	44	81	77	103
Endogenous	Il16	NM_010551.3	57	45	64	51	34	155	97	193	160	60	440	382	474	292	222	145	201	267	338	179	251	998	964	1605
Endogenous	Il17a	NM_010552.3	15	13	14	9	14	14	19	25	29	15	12	16	17	16	13	36	12	10	16	13	18	15	23	13
Endogenous	Il17b	NM_019508.1	9	9	5	11	7	6	7	13	15	12	2	4	14	14	10	7	3	10	14	8	7	8	9	9
Endogenous	Il17f	NM_145856.2	27	22	24	21	23	10	8	12	19	16	12	16	10	28	15	20	9	12	24	22	27	11	18	8
Endogenous	Il17ra	NM_008359.1	415	205	381	407	217	456	316	506	519	285	687	625	768	722	436	411	320	358	734	360	670	878	982	1020
Endogenous	Il17rb	NM_019583.3	24	24	21	26	32	17	23	18	42	31	21	22	20	20	22	30	15	21	17	22	17	13	21	13
Endogenous	Il18	NM_008360.1	808	952	1435	986	361	632	467	374	444	203	235	191	297	569	283	245	186	597	686	952	689	325	329	388
Endogenous	Il18r1	NM_001161842.1	874	953	1181	1018	521	1037	1243	944	1076	441	1652	997	1416	2076	1556	789	1503	1815	2386	1999	1595	4431	3085	2842
Endogenous	Il18rap	NM_010553.2	1004	731	1115	907	494	894	875	823	1327	524	1046	875	1261	2495	1174	555	916	702	1396	1614	1465	1771	1326	1092
Endogenous	Il19	NM_001009940.1	16	8	18	30	18	12	25	14	19	16	11	21	13	23	18	12	4	14	24	22	20	14	12	17
Endogenous	Il1a	NM_010554.4	528	769	467	797	299	2831	1343	1942	2822	829	2230	2299	2326	2010	1569	2554	586	1092	676	1302	626	1447	2585	557
Endogenous	Il1b	NM_008361.3	1031	528	489	644	324	6814	3559	6618	6338	2527	7989	5943	5708	7132	2594	7197	196	581	615	752	885	2214	8050	641
Endogenous	Il1r1	NM_001123382.1	2750	1466	2663	2765	1249	1003	803	748	1592	681	403	406	1162	1694	1012	353	923	970	2160	2291	2310	625	591	945
Endogenous	Il1r2	NM_010555.4	277	157	156	215	136	1115	703	1587	1362	597	1742	1676	1475	1430	696	1021	106	183	214	213	246	705	1427	636
Endogenous	Il1rap	NM_008364.2	94	44	64	95	54	497	321	395	438	201	454	393	412	552	198	462	70	79	172	61	134	249	651	321
Endogenous	Il1rapl2	NM_030688.1	38	34	44	45	24	15	31	15	25	28	12	19	19	27	21	11	17	20	43	45	53	27	19	21
Endogenous	Il1rl1	NM_001025602.2	95	49	96	81	46	69	49	75	58	43	69	59	97	104	68	59	55	62	95	93	98	90	157	157
Endogenous	Il1rl2	NM_133193.3	74	34	63	62	36	86	43	52	58	28	38	64	52	65	61	57	75	92	86	83	78	72	103	304
Endogenous	Il1rn	NM_031167.5	1636	540	1413	1955	1123	5157	2541	5311	5089	2978	7250	7919	9489	7524	3522	6538	728	718	1283	1364	2436	3406	14215	1332
Endogenous	Il2	NM_008366.3	14	13	19	20	18	12	17	27	27	26	23	19	28	31	26	9	13	19	14	22	24	12	10	19
Endogenous	Il21	NM_021782.2	11	18	13	24	15	21	10	24	11	16	14	19	19	25	23	14	4	14	14	22	18	36	33	24
Endogenous	Il21r	NM_021887.1	62	42	47	65	36	102	61	115	92	58	311	299	335	367	250	75	224	251	352	226	273	855	704	724
Endogenous	Il22	NM_016971.1	11	7	8	20	9	8	13	7	14	5	11	5	11	18	8	17	7	11	9	14	12	16	6	14
Endogenous	Il22ra1	NM_178257.1	408	337	602	529	263	271	281	227	492	157	142	165	228	507	240	187	157	181	349	305	369	130	93	45
Endogenous	Il22ra2	NM_178258.5	18	28	25	27	32	19	28	28	32	20	18	23	19	27	37	35	18	22	22	32	23	33	19	27
Endogenous	Il23a	NM_031252.1	45	72	107	117	50	70	65	69	45	36	28	32	77	59	54	47	45	51	97	96	100	91	71	39
Endogenous	Il23r	NM_144548.1	15	19	16	19	16	16	15	23	15	21	13	18	10	22	21	13	13	24	13	16	23	13	23	23
Endogenous	Il24	NM_053095.2	19	9	9	33	12	21	13	16	31	13	29	18	41	51	28	14	13	11	14	17	33	35	30	20
Endogenous	Il25	NM_080729.2	17	11	11	31	21	10	11	11	19	18	17	9	25	22	8	9	6	14	17	13	20	8	16	24
Endogenous	Il27	NM_145636.1	9	10	5	15	9	14	9	12	14	13	8	12	20	13	10	16	8	5	7	11	17	11	14	14
Endogenous	Il2ra	NM_008367.2	60	28	42	43	23	172	143	240	190	96	826	757	1006	675	446	138	220	179	231	188	205	1398	1125	805
Endogenous	Il2rb	NM_008368.3	94	74	111	129	43	311	332	812	759	250	4167	3649	5492	3262	2701	507	1375	1319	2044	1609	2237	10024	7825	7219
Endogenous	Il2rg	NM_013563.3	126	39	80	109	52	144	95	176	209	94	524	465	577	478	307	169	150	227	379	189	393	932	925	1116
Endogenous	Il3	NM_010556.4	15	10	11	15	12	14	13	13	18	18	12	8	12	9	12	14	7	11	12	18	10	6	15	14
Endogenous	Il34	NM_001135100.1	1234	866	1052	1486	553	553	628	543	872	456	280	391	792	1126	572	294	896	724	1259	1635	1593	541	366	206
Endogenous	Il3ra	NM_008369.1	308	200	257	329	169	208	220	219	293	153	168	184	327	346	210	136	190	262	312	313	342	262	283	497
Endogenous	Il4	NM_021283.1	11	11	13	15	22	14	12	11	16	15	23	8	17	16	20	15	4	9	9	9	10	7	10	24
Endogenous	Il4ra	NM_010557.1	3207	1337	3421	3753	1784	2384	1875	1630	3504	1297	1591	1668	3169	4380	2288	1460	1645	1295	3630	2892	3632	1339	1714	1857
Endogenous	Il5	NM_010558.1	15	17	20	22	24	18	20	23	27	24	15	22	14	22	27	27	18	21	19	23	20	14	14	15
Endogenous	Il5ra	NM_008370.2	68	38	68	100	52	132	67	107	74	48	29	33	120	89	96	15	266	34	98	181	257	99	88	32
Endogenous	Il6	NM_031168.1	50	35	34	37	18	244	69	80	143	75	65	108	83	119	65	103	81	99	49	82	72	56	175	236
Endogenous	Il6ra	NM_010559.2	514	317	468	414	248	429	346	375	564	273	329	301	524	802	373	246	191	245	456	478	486	233	337	814
Endogenous	Il6st	NM_010560.2	1636	1033	1449	1389	658	831	766	842	853	560	584	659	861	1096	707	521	858	1096	1192	1604	1290	698	788	1159
Endogenous	Il7	NM_008371.2	30	24	36	23	20	26	13	24	34	16	19	14	24	45	32	11	19	19	47	40	40	36	33	27
Endogenous	Il7r	NM_008372.3	105	45	65	108	69	101	79	129	119	107	518	284	571	536	362	116	680	602	742	909	814	2125	1424	1404
Endogenous	Il9	NM_008373.1	9	4	8	17	11	12	12	12	19	20	12	17	11	10	15	8	6	10	10	12	17	11	12	13
Endogenous	Ilf3	NM_010561.2	684	341	691	536	323	162	205	221	237	147	158	189	282	502	235	140	277	265	593	524	649	345	259	227
Endogenous	Inpp5d	NM_001110192.1	49	19	32	56	24	76	51	88	63	44	107	120	149	130	81	59	55	74	68	93	104	189	212	261
Endogenous	Irak1	NM_008363.2	800	451	725	823	325	331	309	358	383	203	306	296	448	681	390	203	375	371	733	638	743	600	528	587
Endogenous	Irak2	NM_001113553.1	1241	1412	1220	1149	567	2360	2484	2570	2575	1507	2495	3180	3054	3546	2138	2601	915	1537	1032	2155	1318	1774	2333	1162
Endogenous	Irak3	NM_028679.3	102	36	41	67	43	150	49	81	108	78	142	147	156	132	75	109	27	63	74	60	82	78	299	277
Endogenous	Irak4	NM_029926.5	585	494	769	591	297	389	391	428	481	263	375	328	488	712	399	251	471	526	734	774	774	633	505	736
Endogenous	Irf1	NM_008390.1	1806	2245	2042	1650	764	7326	9797	8206	10007	3974	12756	12959	13511	19405	10493	8352	1912	2314	2017	2857	2416	8683	7673	4001
Endogenous	Irf2	NM_008391.2	1655	2016	1845	1761	729	2451	3224	3729	2248	1780	3921	4343	4490	3446	2932	3441	1862	3185	1629	2646	1917	3498	3715	3991
Endogenous	Irf3	NM_016849.4	1182	681	1129	1233	560	650	743	530	948	479	511	527	1036	1066	855	440	683	638	977	1324	1067	867	687	599
Endogenous	Irf4	NM_013674.1	19	10	11	21	12	32	12	33	26	18	84	121	127	70	56	26	37	39	61	52	45	394	301	360
Endogenous	Irf5	NM_012057.3	220	100	148	179	84	455	215	384	399	195	534	468	539	530	290	404	79	151	213	178	243	281	738	1071
Endogenous	Irf7	NM_016850.2	104	101	100	91	59	696	556	460	829	212	1074	898	828	1085	549	749	71	98	210	109	198	595	994	378
Endogenous	Irf8	NM_008320.3	151	76	95	110	63	226	154	232	222	116	669	727	770	734	439	258	85	148	207	146	201	468	566	827
Endogenous	Irgm2	NM_019440.2	101	69	125	85	70	518	529	562	885	274	771	799	911	2003	740	529	82	111	174	116	176	625	641	312
Endogenous	Isg15	NM_015783.1	85	63	67	78	55	1117	778	743	1239	349	1459	1169	1123	1666	681	1247	44	63	135	85	157	541	1317	181
Endogenous	Isg20	NM_020583.5	1843	1718	1735	1989	905	2703	3025	3257	3728	1677	4073	4198	5077	6574	3941	2687	1740	1663	1802	2634	2536	3972	3918	1348
Endogenous	Itch	NM_008395.2	4561	2118	3705	3899	1666	1853	1778	1911	2705	1366	1749	1736	3099	3360	2161	1166	2004	2001	3081	3857	3662	2214	2149	2413
Endogenous	Itga1	NM_001033228.3	8382	3874	9878	10233	4099	2689	2592	2611	4699	1862	1354	1313	2409	6288	2699	1293	2228	2400	7912	7935	6214	3612	2053	1704
Endogenous	Itga2	NM_008396.2	5791	2307	6174	7552	3673	2505	2055	2664	4476	1939	1447	1544	2276	7003	2528	1255	2174	2032	7846	7580	8914	2412	1904	869
Endogenous	Itga2b	NM_010575.2	74	70	71	52	28	48	68	62	42	42	28	76	88	65	56	35	53	89	89	104	68	48	50	33
Endogenous	Itga4	NM_010576.3	81	53	58	61	26	220	175	250	246	154	865	727	1079	465	363	289	519	876	799	465	652	2364	2324	3918
Endogenous	Itga5	NM_010577.3	3022	2086	2852	3036	1437	1272	1684	1388	1465	1118	1008	1348	2105	2672	1409	671	2804	2500	3170	4268	4002	1305	1666	1334
Endogenous	Itga6	NM_008397.3	16892	5300	16224	22806	10666	5314	4683	4154	8648	3632	2638	2158	4584	10346	5234	2581	4361	3963	15202	9895	15539	4336	3106	1904
Endogenous	Itgae	NM_008399.1	92	122	142	90	69	64	65	190	119	70	134	83	106	265	213	78	206	570	576	505	340	1114	165	207
Endogenous	Itgal	NM_008400.2	107	104	118	99	78	429	346	586	488	283	1586	1412	1677	1134	742	586	665	826	985	600	778	3650	2758	3312
Endogenous	Itgam	NM_008401.2	457	207	204	303	182	939	501	732	956	651	1136	1205	1475	1278	666	847	424	593	566	671	792	665	2271	2753
Endogenous	Itgax	NM_021334.2	78	58	98	80	61	121	94	167	162	98	164	148	215	211	134	101	105	123	158	140	191	212	196	293
Endogenous	Itgb1	NM_010578.1	33132	8677	29122	40295	18310	9908	7763	7227	13452	6655	5401	4824	9155	17660	8493	4759	9711	8585	31890	19211	32335	11253	10396	10178
Endogenous	Itgb2	NM_008404.4	328	183	224	288	201	783	420	700	746	546	1670	1573	2133	1498	903	717	488	671	881	752	1095	2552	3373	3989
Endogenous	Itgb3	NM_016780.2	1050	265	877	1150	627	253	183	240	581	303	207	201	580	740	370	100	302	176	871	843	1079	227	340	215
Endogenous	Itgb4	NM_001005608.2	2243	1626	3956	3387	1847	778	999	880	1473	588	585	488	1076	2391	1178	424	1134	901	2947	2481	3231	870	590	232
Endogenous	Itk	NM_010583.3	13	14	17	21	11	15	13	27	25	12	168	146	274	142	150	14	197	173	259	238	220	728	534	517
Endogenous	Jak1	NM_146145.2	2262	1068	1823	2330	1094	1508	1031	1419	1558	851	2220	1964	2473	2727	1610	976	1351	1690	2839	1702	3116	4498	3975	5137
Endogenous	Jak2	NM_008413.2	3029	2595	3480	2950	1237	2029	2016	2138	2459	1160	2160	1796	2379	4387	2259	1564	2544	2870	4310	4140	4106	2811	2558	1742
Endogenous	Jak3	NM_010589.5	1109	649	1016	1035	561	445	588	548	766	442	441	528	989	1229	690	328	517	510	1023	1574	1248	743	621	522
Endogenous	Jam3	NM_023277.4	95	42	87	87	44	63	31	15	34	18	21	29	23	49	26	21	45	56	111	71	89	30	54	131
Endogenous	Jun	NM_010591.2	1578	1084	1591	1121	623	1138	768	911	968	433	1185	889	1126	1651	762	678	746	796	1697	1033	1444	1412	2290	2349
Endogenous	Kdr	NM_010612.2	515	250	515	508	248	226	171	165	150	100	117	172	208	302	235	56	615	608	953	760	767	236	381	391
Endogenous	Kit	NM_001122733.1	31	35	39	33	31	23	35	25	26	31	43	33	39	52	42	20	11	34	38	36	55	20	31	32
Endogenous	Klra1	NM_016659.3	14	22	28	39	27	16	15	13	14	19	20	10	18	22	18	17	11	19	36	32	29	15	12	16
Endogenous	Klra15	NM_013793.2	10	9	10	8	4	8	4	8	7	5	7	11	7	9	8	5	8	8	4	4	6	5	14	12
Endogenous	Klra17	NM_133203.4	16	12	20	14	17	38	44	52	70	36	56	60	52	65	41	62	16	29	17	18	17	29	57	24
Endogenous	Klra2	NM_001170851.1	489	170	260	449	171	574	382	394	851	300	513	521	878	858	515	426	236	315	354	521	406	290	720	320
Endogenous	Klra20	NM_053150.2	14	19	22	15	24	18	18	13	22	12	16	13	12	12	18	32	13	14	11	24	16	14	13	10
Endogenous	Klra21	NM_053151.1	4	13	18	21	9	10	18	13	13	10	13	11	12	14	14	8	9	16	11	12	14	16	16	17
Endogenous	Klra27	XM_916590.3	15	4	10	7	6	8	4	9	4	3	10	7	11	13	12	6	4	4	10	9	9	6	8	11
Endogenous	Klra3	NM_010648.2	5	14	8	22	15	16	11	16	12	9	17	18	18	21	10	22	7	12	7	14	13	20	23	20
Endogenous	Klra4	NM_010649.3	321	212	153	336	158	86	91	144	146	109	139	191	218	320	131	77	136	116	154	229	323	49	50	44
Endogenous	Klra5	NM_008463.2	13	13	16	17	19	11	21	49	31	21	124	90	132	63	79	28	17	11	9	31	24	26	25	12
Endogenous	Klra6	NM_008464.2	78	86	1	1	10	52	7	42	71	39	97	124	126	38	70	40	37	29	1	43	10	9	2	16
Endogenous	Klra7	NM_001110323.1	24	26	22	15	34	47	35	85	87	49	926	849	834	433	327	69	13	20	15	28	22	49	83	41
Endogenous	Klrb1	NM_001099918.1	15	10	14	14	29	16	17	16	27	30	21	18	22	19	32	31	10	21	19	20	29	18	14	22
Endogenous	Klrb1c	NM_008527.2	12	9	17	19	20	31	39	49	33	33	123	145	140	91	78	68	7	13	11	13	11	18	20	28
Endogenous	Klrc1	NM_001136068.1	230	455	410	415	193	163	158	568	332	129	2585	2166	3135	1999	1689	143	1511	1791	1300	1690	1443	10073	6420	5627
Endogenous	Klrc2	NM_010653.4	114	195	243	188	89	68	63	183	105	61	504	497	679	477	360	97	297	329	521	282	346	1463	815	986
Endogenous	Klrd1	NM_010654.2	51	44	57	79	31	151	127	430	237	96	3033	2383	3187	1824	1491	188	830	1002	1337	1014	1154	9995	5914	5456
Endogenous	Klrg1	NM_016970.1	24	7	25	30	20	37	26	34	24	30	280	233	241	119	91	23	27	29	32	19	36	46	92	116
Endogenous	Klrk1	NM_001083322.1	31	22	24	29	31	120	102	177	138	73	1220	970	1282	631	493	182	285	364	324	214	329	2827	1850	1961
Endogenous	Lag3	NM_008479.1	119	100	76	92	43	83	93	251	213	91	668	740	1128	780	727	86	178	183	239	259	274	2471	1897	1384
Endogenous	Lamp1	NM_010684.2	13553	5024	11313	14712	6757	5480	4198	4030	5869	2968	3533	3017	4438	9261	4373	2655	3771	4300	13722	7784	11864	6029	5526	10491
Endogenous	Lamp2	NM_001017959.1	5606	2880	6052	5243	3039	3406	2824	2671	3201	1993	2411	2550	2692	5169	2324	2127	2467	3051	7773	5757	5820	2591	3288	5620
Endogenous	Lamp3	NM_177356.3	10	10	7	16	13	9	10	7	10	11	8	6	15	11	3	3	3	10	10	9	13	10	5	9
Endogenous	Lbp	NM_008489.2	2228	760	2879	1845	1484	1086	607	1022	1376	608	316	424	476	1506	387	384	333	664	1950	646	1349	154	238	1155
Endogenous	Lck	NM_010693.2	22	36	28	24	13	39	46	109	96	33	586	500	728	403	367	59	578	666	615	582	596	2722	1991	2149
Endogenous	Lcn2	NM_008491.1	1999	531	1250	1398	917	3350	6736	9547	8612	3670	2721	4991	6535	12043	3140	4006	266	786	1352	417	1154	481	2030	1162
Endogenous	Lcp1	NM_001247984.1	920	646	574	793	378	3843	2257	4273	3571	2047	7537	6657	7745	5771	3221	3565	1191	2238	1901	1551	2367	11420	12298	12367
Endogenous	Lgals3	NM_001145953.1	6832	4069	5272	7393	3473	5289	4722	5737	5620	3991	8404	6328	8585	11996	6242	3789	4491	4835	6903	8372	10971	9541	11943	14902
Endogenous	Lif	NM_008501.2	2246	1377	1768	3288	1129	1680	1447	1450	3317	1055	1120	1176	2947	4068	2382	1227	2015	1104	2779	4795	3021	1157	1363	360
Endogenous	Lilra5	NM_001081239.2	38	22	33	34	26	28	26	49	43	24	29	29	48	54	37	37	13	25	24	31	29	15	29	43
Endogenous	Litaf	NM_019980.1	786	514	757	846	401	907	600	821	754	419	863	784	853	1148	589	735	380	555	1006	707	1137	1097	1338	925
Endogenous	Lrp1	NM_008512.2	5492	2200	5620	5186	2869	1987	1475	1451	2233	1331	1260	1448	2118	3338	1731	1017	1976	1919	5746	3180	4305	1116	2149	4722
Endogenous	Lrrn3	NM_010733.2	4	4	8	8	12	3	7	6	10	8	3	3	5	9	8	1	7	5	13	5	8	4	9	8
Endogenous	Lta	NM_010735.1	14	12	26	11	11	24	13	26	25	18	39	25	24	50	37	20	36	28	39	36	31	76	55	57
Endogenous	Ltb	NM_008518.2	73	74	88	74	48	283	169	335	280	151	830	632	794	619	450	298	698	916	764	735	649	3561	2396	2757
Endogenous	Ltbr	NM_010736.3	3247	2565	3733	3290	1564	1548	2279	1756	2430	1043	1446	1566	2728	3364	2263	1005	1622	1588	2266	2846	2699	1264	1113	837
Endogenous	Ltf	NM_008522.3	10	19	14	20	34	15	19	33	35	40	20	30	28	26	29	18	14	14	11	21	17	10	20	15
Endogenous	Ltk	NM_008523.2	57	65	67	59	38	28	39	53	46	27	30	46	63	54	51	29	30	47	52	85	58	40	38	42
Endogenous	Ly86	NM_010745.2	223	135	131	182	81	484	174	379	481	161	533	442	496	516	335	291	71	245	192	134	235	197	487	2396
Endogenous	Ly9	NM_008534.2	75	41	19	43	37	47	40	60	67	41	225	174	234	160	146	70	223	228	262	187	220	598	541	1353
Endogenous	Ly96	NM_001159711.1	1743	884	1625	1813	768	1025	886	736	1256	560	483	537	883	1313	731	584	469	647	1444	1595	1243	513	591	796
Endogenous	Lyn	NM_010747.1	474	245	389	473	236	710	496	662	906	363	703	753	856	1105	457	613	198	264	487	443	521	314	766	907
Endogenous	Lyve1	NM_053247.4	44	41	31	38	29	228	12	9	111	32	18	55	29	26	19	22	80	160	62	36	44	21	57	1151
Endogenous	Lyz2	NM_017372.3	16870	5147	7136	12221	7902	17159	4591	7474	13300	10152	9794	8916	12124	12275	8105	9019	4579	10604	8918	14174	15366	5944	19457	88975
Endogenous	Maf	NM_001025577.2	121	64	80	101	47	75	31	32	69	35	65	66	99	91	58	23	47	80	98	57	128	46	101	518
Endogenous	Map2k1	NM_008927.3	2922	1323	2363	3293	1372	1439	1355	1471	1732	1011	1433	1228	1724	3342	1623	967	1305	1236	3095	2519	3902	2061	2248	1191
Endogenous	Map2k2	NM_023138.4	2078	1284	2017	2165	901	1319	1059	1004	1457	754	1056	836	1401	2089	1223	660	1177	1043	1939	2090	2106	1839	1365	1449
Endogenous	Map2k4	NM_009157.4	905	427	828	850	404	539	427	544	559	318	457	408	473	896	420	386	369	417	969	708	844	589	577	496
Endogenous	Map3k1	NM_011945.2	2114	954	1909	2081	937	598	712	647	988	619	474	462	833	1460	711	344	725	730	1751	2867	1965	623	653	697
Endogenous	Map3k5	NM_008580.4	1435	853	1341	1549	605	516	582	532	787	416	436	455	735	1021	549	368	489	620	997	1385	1136	530	547	513
Endogenous	Map3k7	NM_009316.1	710	742	1051	871	422	426	480	401	461	293	342	308	509	843	495	246	556	639	1031	1024	993	635	644	623
Endogenous	Map4k2	NM_009006.2	578	672	506	632	218	467	648	642	502	343	683	699	914	740	603	388	634	735	555	868	675	1327	1121	1055
Endogenous	Mapk1	NM_011949.3	3453	1082	2226	3412	1252	1160	856	1074	1479	672	987	941	1211	2283	1055	679	932	1068	2295	2010	2955	2040	1723	1819
Endogenous	Mapk11	NM_011161.5	1207	1152	1025	1232	519	1119	1430	1196	1078	830	669	1017	1354	1298	989	977	993	1185	945	1979	1200	678	619	385
Endogenous	Mapk14	NM_001168513.1	4386	4215	4388	3662	1671	2567	3283	2813	2760	1922	2197	2266	3090	3971	2702	1599	2989	3881	3803	4985	3721	3579	2814	3454
Endogenous	Mapk3	NM_011952.2	4099	3083	4472	4421	2204	2826	2975	2655	3312	2018	1565	1911	2668	3898	2420	1854	2384	2399	3825	5377	4424	2191	2167	1664
Endogenous	Mapk8	NM_016700.3	1562	605	1135	1537	534	578	490	360	794	351	267	236	559	908	502	235	483	389	1096	1349	1236	427	381	285
Endogenous	Mapkapk2	NM_008551.1	1380	723	1366	1432	599	936	792	849	955	510	1110	941	1255	1798	975	717	654	712	1578	1195	1571	1233	1522	1528
Endogenous	Marco	NM_010766.2	16	15	8	19	14	17	9	17	18	7	16	16	25	18	17	7	78	86	70	36	33	27	65	2253
Endogenous	Masp1	NM_008555.2	139	46	162	111	74	29	32	35	50	32	36	29	46	79	38	25	28	33	75	56	114	31	36	40
Endogenous	Masp2	NM_010767.3	15	16	8	21	9	8	16	11	7	18	11	8	17	22	13	14	6	17	16	19	17	16	10	20
Endogenous	Mavs	NM_144888.1	497	421	715	690	270	216	251	216	303	172	219	187	346	547	327	111	245	277	553	582	531	313	266	399
Endogenous	Mbl2	NM_010776.1	8	2	8	16	13	6	5	10	8	12	7	8	6	4	3	6	3	5	11	7	12	6	6	11
Endogenous	Mcam	NM_023061.2	1881	578	1487	1639	753	777	511	481	730	406	238	334	615	783	603	252	875	827	1990	1887	2239	320	645	471
Endogenous	Mef2c	NM_001170537.1	130	72	123	97	60	78	45	64	58	58	43	49	67	91	60	51	57	86	133	106	120	44	84	303
Endogenous	Mefv	NM_001161790.1	125	75	48	76	50	363	259	420	433	210	620	606	678	605	320	575	92	153	96	138	123	277	690	284
Endogenous	Mertk	NM_008587.1	233	141	159	158	81	153	117	143	169	93	224	184	283	269	265	88	281	440	306	386	308	324	456	1430
Endogenous	Mfge8	NM_008594.2	1483	1044	2304	1725	815	814	932	850	814	535	322	534	685	1184	543	542	689	772	1754	1789	1433	626	450	405
Endogenous	Mif	NM_010798.2	9240	6717	8743	11590	5145	6004	7093	8308	7229	5128	7747	7562	10963	14189	8671	5496	6709	6639	9534	12875	12076	9247	10412	6325
Endogenous	Mill2	NM_153760.2	157	152	264	197	100	80	86	81	144	57	42	65	90	219	79	56	55	76	167	182	207	39	33	97
Endogenous	Mme	NM_008604.3	24	8	22	12	15	10	9	9	13	13	6	5	13	12	12	7	5	22	19	20	17	3	21	61
Endogenous	Mmp9	NM_013599.2	511	169	1040	726	286	584	385	697	710	421	585	552	561	1061	338	560	110	129	838	425	347	591	729	196
Endogenous	Mnx1	NM_019944.1	11	4	11	13	13	7	8	7	7	8	5	7	9	13	9	12	8	9	16	9	10	8	10	16
Endogenous	Mpo	NM_010824.2	18	10	17	25	21	14	8	13	27	21	12	18	18	19	23	8	10	33	20	23	22	17	16	26
Endogenous	Mpped1	NM_172610.3	3	6	4	13	6	5	2	9	10	7	4	9	8	6	11	5	1	8	7	11	6	5	6	13
Endogenous	Mr1	NM_008209.4	113	24	78	81	47	55	27	44	46	32	72	59	62	109	57	31	62	61	117	61	87	130	138	315
Endogenous	Mrc1	NM_008625.1	1482	934	643	1960	511	1188	430	871	1416	527	717	796	1087	1701	789	283	1318	1326	1149	2185	2089	552	954	5580
Endogenous	Ms4a1	NM_007641.5	12	21	17	33	43	21	29	31	35	32	26	24	37	42	32	37	10	35	159	31	21	20	22	24
Endogenous	Ms4a2	NM_001276330.1	16	24	26	19	11	12	13	16	16	21	14	28	23	26	17	16	8	9	11	12	11	9	16	19
Endogenous	Msln	NM_018857.1	32039	34116	34542	36112	14183	22064	35205	26749	19391	17752	23912	28125	33430	30751	26430	21479	26176	38406	30630	42274	31479	30176	21510	13321
Endogenous	Msr1	NM_001113326.1	375	99	182	264	158	405	195	312	344	232	466	515	678	681	298	256	191	287	400	334	411	371	969	1103
Endogenous	Mst1r	NM_009074.1	1415	1283	1762	2152	689	1360	1132	877	1958	952	565	640	1727	1821	1235	962	630	673	1312	2068	1698	636	570	217
Endogenous	Muc1	NM_013605.1	27378	18324	40966	30572	14623	19107	18782	13911	22390	10295	7479	11488	16000	24880	11541	13170	6818	12399	25107	21340	22190	9938	5965	2771
Endogenous	Mx1	NM_010846.1	12	10	20	14	12	6	8	10	8	10	5	12	10	16	14	11	6	6	12	14	21	11	14	18
Endogenous	Mx2	NM_013606.1	48	36	53	60	42	54	64	50	154	51	45	55	117	193	76	59	17	33	63	33	92	30	53	31
Endogenous	Myc	NM_010849.4	6928	5766	5782	7097	2720	4530	4639	4569	4791	3461	3962	3708	6102	6238	4843	3078	4259	3966	4770	6423	7163	4684	4315	2395
Endogenous	Myd88	NM_010851.2	284	217	312	246	150	513	413	560	554	299	650	585	654	751	409	485	181	298	369	196	305	599	599	740
Endogenous	Ncam1	NM_001113204.1	1455	962	1572	1265	676	333	576	839	428	515	203	411	464	772	453	166	997	914	837	1579	1822	364	335	312
Endogenous	Ncf4	NM_008677.2	300	194	173	271	162	690	401	627	740	423	1374	1148	1552	1254	720	569	425	555	439	669	606	1494	1818	1551
Endogenous	Ncr1	NM_010746.3	15	18	23	13	8	69	81	125	136	66	433	365	344	266	217	134	5	12	13	25	18	16	52	23
Endogenous	Nefl	NM_010910.1	9	7	14	16	16	14	10	18	19	20	12	11	17	21	13	13	16	14	20	33	34	12	13	20
Endogenous	Nfatc1	NM_016791.4	713	466	542	617	267	424	445	380	429	306	384	384	651	644	441	242	485	516	606	1110	800	739	716	674
Endogenous	Nfatc2	NM_001037177.1	378	437	501	339	189	249	409	406	260	200	268	269	353	337	281	225	328	640	387	636	447	578	539	752
Endogenous	Nfatc3	NM_010901.2	581	265	550	543	253	269	238	281	258	143	306	271	358	467	246	171	242	307	591	343	509	730	615	664
Endogenous	Nfatc4	NM_023699.3	354	276	418	332	135	297	372	203	261	133	171	195	278	415	225	107	397	327	382	485	323	263	281	387
Endogenous	Nfkb1	NM_008689.2	706	661	825	703	400	600	546	556	543	340	580	626	650	967	532	466	543	698	1001	939	887	965	750	782
Endogenous	Nfkb2	NM_019408.2	3233	2636	2710	3337	1437	1675	2081	1918	2601	1337	1630	1689	2582	4016	2346	1023	2035	2286	2899	4398	3224	2447	2048	1475
Endogenous	Nfkbia	NM_010907.2	541	347	508	537	278	820	619	678	1051	429	983	928	1136	1532	728	926	373	387	652	652	692	843	1444	808
Endogenous	Nlrc5	NM_001033207.3	66	123	178	99	29	638	546	491	1733	326	1116	1055	1819	3740	1536	604	274	258	727	667	654	1415	1317	1122
Endogenous	Nlrp3	NM_145827.3	194	93	89	177	77	542	290	490	482	326	501	492	611	561	303	524	99	110	122	272	218	260	735	193
Endogenous	Nod1	NM_172729.2	624	473	431	433	234	801	1311	1097	1408	753	1231	1773	1972	2621	1294	949	651	767	669	1152	769	771	829	1230
Endogenous	Nod2	NM_145857.2	60	37	64	46	59	104	98	109	166	62	163	140	151	178	108	137	51	67	78	77	80	80	136	76
Endogenous	Nos2	NM_010927.3	24	17	34	54	44	105	143	158	372	92	459	389	553	533	332	203	66	35	44	68	63	191	505	67
Endogenous	Notch1	NM_008714.2	2118	1253	2310	1677	1043	870	976	841	1472	674	1005	1036	1583	2940	1418	457	1375	1218	2784	3177	2466	1813	1567	1547
Endogenous	Nrp1	NM_008737.2	1387	591	1544	1002	648	471	310	329	352	193	393	374	574	754	426	129	795	907	1751	971	1245	1285	1224	3456
Endogenous	Nt5e	NM_011851.3	5636	2919	5675	6321	2675	2704	2396	2005	3896	1652	1667	1628	3044	5200	2768	1743	1662	2097	6420	5237	6634	2433	2310	692
Endogenous	Nup107	NM_134010.2	1822	1924	1872	1766	815	956	1436	1263	1050	771	1126	1296	1550	1787	1366	692	1784	1938	1788	2214	2092	2189	1717	1470
Endogenous	Oas2	NM_145227.3	273	358	445	289	160	714	765	710	1790	297	1194	957	1754	3102	1680	760	172	240	738	421	730	699	723	389
Endogenous	Oas3	NM_145226.2	30	38	48	40	46	142	161	141	258	74	220	252	300	552	216	180	39	36	75	67	102	161	194	70
Endogenous	Oasl1	NM_145209.3	807	923	892	1083	386	1872	1766	1714	1855	1015	1790	2249	2000	2582	1513	1798	815	1071	915	1925	1287	1050	1268	588
Endogenous	Osm	NM_001013365.2	151	58	51	113	80	714	343	363	529	262	705	333	420	499	243	698	101	120	131	125	161	348	1226	191
Endogenous	Pax5	NM_008782.2	19	9	14	16	12	11	8	9	18	14	12	12	10	14	6	12	5	15	65	15	17	5	13	30
Endogenous	Pdcd1	NM_008798.1	23	13	19	35	24	34	25	124	100	33	667	557	1041	573	523	50	125	239	430	405	411	3609	2671	2009
Endogenous	Pdcd1lg2	NM_021396.2	91	42	45	76	68	156	121	160	184	133	261	247	328	285	218	198	78	69	128	150	129	187	267	102
Endogenous	Pdgfc	NM_019971.2	5405	2972	5140	5145	2434	1328	1701	1300	1864	1133	767	728	1311	3152	1502	608	1967	2024	5296	4518	4763	1225	875	1090
Endogenous	Pdgfrb	NM_008809.1	187	40	223	201	94	49	36	29	66	31	22	28	43	102	39	17	67	45	192	183	132	35	56	101
Endogenous	Pecam1	NM_008816.2	580	225	517	453	272	419	254	313	288	169	386	397	461	563	386	257	498	479	1046	671	810	345	854	798
Endogenous	Pik3cd	XM_003945690.1	132	57	91	117	66	244	148	340	299	119	651	527	716	451	277	256	172	314	415	191	442	1240	1081	1349
Endogenous	Pik3cg	NM_020272.2	71	51	50	56	32	131	78	144	108	42	280	265	309	203	150	87	118	187	148	131	154	456	470	555
Endogenous	Pin1	NM_023371.3	601	248	592	517	244	71	107	65	206	94	47	78	178	302	203	42	165	120	457	340	434	78	86	80
Endogenous	Pla2g1b	NM_011107.1	11	3	4	24	13	13	9	8	5	14	7	6	13	17	10	12	9	11	11	8	12	9	11	13
Endogenous	Pla2g6	NM_001199023.1	1123	917	1255	1011	491	565	818	1020	641	517	485	666	880	873	598	382	887	945	869	1331	1224	468	418	421
Endogenous	Plau	NM_008873.2	1046	427	855	1670	585	568	379	393	602	303	415	342	524	964	464	292	339	328	1349	789	1148	599	841	868
Endogenous	Plaur	NM_011113.3	12813	7834	12028	18533	7036	9262	8371	8684	14910	7277	7257	8449	16441	19092	10933	7024	6839	5480	10281	14576	16839	6931	7078	2434
Endogenous	Pmch	NM_029971.2	12	5	9	15	7	5	4	7	8	13	8	8	8	12	10	7	5	11	16	11	14	10	3	2
Endogenous	Pml	NM_008884.5	1521	1050	1723	1392	666	786	934	722	1104	510	887	802	1192	1783	1092	549	882	826	1487	1182	1472	1107	894	992
Endogenous	Pnma1	NM_027438.3	32	42	50	44	26	17	34	24	31	20	17	43	53	55	46	23	39	44	58	85	44	35	22	26
Endogenous	Pou2af1	NM_011136.2	12	10	12	22	19	13	12	10	17	16	14	14	11	18	21	12	5	13	34	15	11	9	16	26
Endogenous	Pou2f2	NM_001163556.1	87	93	64	60	25	242	216	401	274	152	224	288	350	240	203	298	168	399	166	217	145	372	482	799
Endogenous	Pparg	NM_011146.1	850	430	793	951	384	380	280	343	597	252	212	216	351	692	388	235	241	278	606	1045	629	315	237	167
Endogenous	Ppbp	NM_023785.2	136	53	88	145	115	116	51	68	77	224	82	133	117	121	84	68	45	66	65	124	119	62	179	92
Endogenous	Prdm1	NM_007548.3	160	62	151	127	59	180	141	178	161	107	266	239	307	367	206	144	217	171	333	341	234	577	584	334
Endogenous	Prf1	NM_011073.2	15	11	38	25	20	44	70	90	100	47	850	1022	1291	694	466	68	80	93	106	97	108	930	873	632
Endogenous	Prg2	NM_008920.4	9	9	9	12	10	13	8	13	8	9	11	5	7	10	14	8	7	7	16	13	9	5	9	15
Endogenous	Prkcd	NM_011103.2	4000	4095	4039	4262	1714	3064	3589	3331	3157	2326	2630	2572	3859	4482	2794	2502	2738	4635	3862	7026	5029	2946	3416	3481
Endogenous	Prkce	NM_011104.2	237	184	296	252	121	140	146	115	175	89	124	107	180	300	153	81	152	144	312	246	224	173	133	159
Endogenous	Psen1	NM_008943.2	1409	739	1667	1536	821	720	488	534	797	324	569	461	621	1352	650	412	544	618	1669	933	1393	936	841	974
Endogenous	Psen2	NM_001128605.1	1022	683	1239	1174	562	419	430	414	589	330	428	493	720	1003	552	262	517	562	982	952	1006	609	612	835
Endogenous	Psma2	NM_008944.2	4526	2544	3886	4590	1991	3346	2706	2782	3304	1839	2786	2645	3422	4969	2762	1834	2271	2456	3513	3449	4304	4422	3674	3178
Endogenous	Psmb10	NM_013640.3	151	169	159	173	75	751	945	862	1287	460	1156	1176	1498	2278	1212	737	140	187	206	220	228	1138	916	669
Endogenous	Psmb7	NM_011187.1	2228	1170	2057	2335	1136	1568	1177	1411	1393	734	1198	1035	1151	2077	1144	753	1011	1452	2215	1465	2396	2376	1909	1631
Endogenous	Psmb8	NM_010724.2	249	313	263	216	113	1467	1274	2207	2511	692	5685	4375	4912	6866	3736	1342	1020	1187	1212	931	1203	6720	5963	5262
Endogenous	Psmb9	NM_013585.2	67	77	86	84	66	604	492	687	1164	290	1425	1221	1433	2676	1262	622	195	257	353	318	342	1516	1426	1076
Endogenous	Psmd7	NM_010817.2	4372	2178	3401	4637	1760	2388	2100	1859	3050	1415	1682	1306	2300	3880	2419	1227	1767	1736	3095	3287	3360	2715	2022	1651
Endogenous	Ptgdr2	NM_009962.2	22	20	18	17	39	19	23	18	18	35	25	24	30	19	22	33	21	31	26	13	17	29	18	12
Endogenous	Ptgs2	NM_011198.3	3939	1766	1900	5174	1587	3417	2818	2727	3690	2793	2765	2522	4388	4622	2513	2680	2099	1965	3161	5553	3935	1849	3793	788
Endogenous	Ptprc	NM_011210.3	477	242	316	417	152	799	599	1014	1076	511	2412	2138	2844	2160	1523	788	1200	1236	1706	1595	1748	4271	3897	4158
Endogenous	Pvr	NM_027514.2	2770	1256	2643	3578	1485	854	1032	873	1550	755	617	653	1536	2219	1235	545	999	889	2935	2463	2815	858	795	374
Endogenous	Pvrl2	NM_001159724.1	3132	1897	4300	3988	2191	1420	1639	1580	2194	1117	930	1181	1766	3435	1576	1074	1164	1344	3596	2695	3581	1076	904	611
Endogenous	Pycard	NM_023258.4	29	15	19	17	16	25	15	18	22	16	21	35	40	25	29	12	17	22	49	39	37	43	40	82
Endogenous	Raet1	NM_009018.1	1026	534	745	995	451	266	273	415	479	272	217	271	443	663	308	88	382	427	522	735	836	209	238	164
Endogenous	Rag1	NM_009019.2	13	6	16	16	7	14	12	17	18	16	12	12	21	16	12	15	7	8	17	11	11	12	18	22
Endogenous	Rel	NM_009044.2	431	262	432	474	240	353	299	322	368	224	416	326	455	610	338	277	282	297	489	509	439	603	624	473
Endogenous	Rela	NM_009045.4	1737	1323	1561	1691	760	1083	1211	1046	1258	714	858	900	1172	1886	1075	617	984	1093	1489	2142	1652	1184	983	788
Endogenous	Relb	NM_009046.2	657	472	627	685	339	341	343	305	409	201	371	308	409	770	378	257	426	400	886	1003	702	527	498	419
Endogenous	Reps1	NM_001111065.1	886	839	789	800	388	501	562	601	536	386	574	568	795	870	607	293	836	759	776	1192	1220	1076	956	1054
Endogenous	Ripk2	NM_138952.3	171	71	159	124	76	134	99	92	210	53	131	108	121	288	110	105	83	80	207	160	169	156	176	161
Endogenous	Rora	NM_013646.1	139	45	120	131	78	67	57	66	80	33	136	93	126	154	92	41	116	94	212	156	210	292	285	318
Endogenous	Rorc	NM_011281.2	620	606	712	366	275	95	322	494	215	233	55	167	216	315	132	86	96	359	229	307	347	48	50	72
Endogenous	Rps6	NM_009096.3	301	139	336	364	215	118	117	110	217	79	90	88	169	248	175	82	153	155	366	270	412	203	151	151
Endogenous	Rrad	NM_019662.2	119	61	96	116	52	62	35	55	69	36	77	48	103	110	67	34	68	76	145	144	115	169	152	187
Endogenous	Rsad2	NM_021384.4	68	42	53	70	82	242	181	216	362	108	569	326	446	514	290	404	30	39	100	58	93	189	827	82
Endogenous	Runx1	NM_001111021.1	2283	825	1896	2298	968	1026	770	941	967	591	659	640	813	1718	727	564	664	893	2264	1337	2491	923	1004	858
Endogenous	Runx3	NM_019732.2	54	32	38	41	21	69	55	88	80	52	203	184	295	177	144	66	157	174	129	217	174	462	477	421
Endogenous	S100a8	NM_013650.2	1955	1200	756	1015	1003	18392	10026	13422	18587	6315	18405	17638	18537	15800	7663	15470	823	1556	1416	1258	1489	7722	33898	4375
Endogenous	S100b	NM_009115.3	19	12	33	26	13	12	9	17	10	15	7	9	10	15	10	6	8	16	19	13	45	9	12	32
Endogenous	Saa1	NM_009117.3	18	13	13	26	16	15	8	10	13	19	13	12	17	13	8	11	12	19	21	13	16	7	15	15
Endogenous	Sbno2	NM_183426.1	1968	1718	2001	2069	1000	1500	2087	1832	2201	1132	1285	1713	2346	3178	1781	1156	1799	2101	2092	3054	2302	1570	1586	1390
Endogenous	Sele	NM_011345.2	4	4	9	9	4	6	5	7	12	10	9	6	13	14	7	4	5	5	12	11	12	11	33	32
Endogenous	Sell	NM_001164059.1	176	105	94	117	93	1097	862	871	1275	585	1725	1590	1545	1696	747	1115	169	320	292	221	273	362	1612	685
Endogenous	Selplg	NM_009151.3	278	180	162	202	112	1114	715	1327	1308	507	3619	2823	3504	2384	1463	1125	980	1436	1763	958	1457	7509	6218	7434
Endogenous	Serpinb2	NM_001174170.1	39	29	17	47	29	196	34	37	54	39	33	68	61	45	45	44	58	61	65	98	122	18	181	66
Endogenous	Serping1	NM_009776.3	953	326	586	716	367	1499	580	566	2112	310	611	912	1053	1861	868	631	744	965	1777	1473	1363	630	1259	5059
Endogenous	Sh2b2	NM_018825.3	113	71	75	138	61	133	124	158	175	123	352	301	409	292	241	169	104	122	143	206	149	199	610	130
Endogenous	Sh2d1a	NM_011364.3	17	21	21	18	9	20	13	39	29	8	255	212	288	139	110	23	195	207	154	211	175	668	566	690
Endogenous	Sh2d1b1	NM_012009.4	69	37	51	70	51	66	53	82	74	47	84	85	102	89	78	61	36	61	72	77	102	62	86	113
Endogenous	Sigirr	NM_023059.3	1222	810	1402	1326	587	533	566	615	791	383	503	474	721	1339	708	279	1014	613	1068	1689	1475	1001	647	600
Endogenous	Siglec1	NM_011426.3	101	52	37	56	60	80	31	26	107	36	25	49	55	64	56	33	54	94	96	81	105	41	60	515
Endogenous	Slamf1	NM_013730.4	8	1	12	11	13	11	7	13	15	18	51	39	73	49	55	12	25	47	70	35	70	134	143	149
Endogenous	Slamf6	NM_030710.2	33	13	21	23	12	28	10	26	17	22	60	68	98	74	42	23	57	70	91	52	84	189	266	279
Endogenous	Slamf7	NM_144539.5	48	46	65	59	35	98	100	180	153	65	820	663	904	634	490	136	222	299	481	304	364	1619	1237	1204
Endogenous	Slc11a1	NM_013612.2	135	67	69	120	56	289	184	297	327	157	390	349	496	435	217	265	92	138	153	160	225	180	552	1024
Endogenous	Slc7a11	NM_011990.2	332	184	453	488	251	214	159	217	359	186	214	249	311	805	280	206	88	104	234	249	476	147	344	74
Endogenous	Smad2	NM_010754.4	551	407	747	683	363	462	369	349	339	216	297	257	292	572	314	275	335	389	849	526	719	568	487	500
Endogenous	Smad3	NM_016769.3	6291	3634	5671	6357	2627	2102	2576	2469	3153	1819	1344	1732	3021	5059	2457	1166	2866	2709	5023	8733	7204	1692	1600	959
Endogenous	Smad4	NM_008540.2	2443	942	1865	2300	914	1120	904	837	1142	623	716	655	869	1686	825	563	826	964	2180	1905	2000	1345	1104	1105
Endogenous	Smn1	NM_011420.2	1612	1169	1698	1826	782	1108	970	972	1081	670	796	779	1064	1672	938	531	946	1126	1468	1510	1753	1424	1192	966
Endogenous	Smpd3	NM_021491.3	8935	3487	10463	10648	4860	2903	2347	1832	4930	1644	1149	985	2019	5381	2284	1194	1472	1886	6545	4439	6567	1738	916	574
Endogenous	Snai1	NM_011427.2	52	24	41	69	38	68	30	38	63	31	30	32	65	79	34	25	59	44	60	86	95	36	67	77
Endogenous	Socs1	NM_009896.2	145	77	124	182	90	1090	826	828	1657	446	1406	1189	1413	3102	1138	1188	65	79	188	172	199	793	897	216
Endogenous	Socs3	NM_007707.2	458	668	377	374	161	1078	683	866	775	480	686	701	730	1078	601	659	424	586	350	990	504	728	628	478
Endogenous	Spink5	NM_001081180.1	9	4	10	12	11	6	7	16	11	4	9	6	10	18	12	13	3	8	13	13	8	10	6	8
Endogenous	Spn	NM_001037810.1	91	71	115	112	62	114	121	227	174	111	916	746	1144	637	602	127	950	838	1055	908	1022	3122	2151	2367
Endogenous	Spp1	NM_009263.3	194221	76888	189073	179428	100007	52848	44521	56865	63917	53138	17198	23980	43547	86649	33884	28050	48222	63773	158434	126095	161173	17972	18263	14732
Endogenous	St6gal1	NM_001252506.1	3316	1272	4003	4081	1999	1020	821	1060	1445	606	467	399	618	2258	896	478	850	913	3833	1520	3334	917	648	650
Endogenous	Stat1	NM_009283.3	487	456	552	460	226	2835	3195	2929	4403	1564	5055	4973	5917	10945	4579	2691	430	498	843	631	960	3387	3497	1954
Endogenous	Stat2	NM_019963.1	851	477	941	724	401	808	822	575	1298	378	903	790	1107	2290	1050	696	400	332	1209	690	1030	846	865	651
Endogenous	Stat3	NM_213659.2	2158	1550	2147	2031	1117	1574	1957	2052	1969	1187	2210	2258	2578	3522	1971	1351	1422	1741	2524	2492	2379	2786	2851	2186
Endogenous	Stat4	NM_011487.4	42	17	38	51	21	51	33	71	49	37	250	196	247	157	122	61	94	137	155	96	164	576	526	530
Endogenous	Stat5b	NM_011489.3	620	254	530	595	275	295	291	306	393	186	406	333	486	676	382	207	234	277	624	458	604	832	811	922
Endogenous	Stat6	NM_009284.2	1887	791	1801	1950	828	1067	786	1011	1440	652	1293	1140	1598	2268	1085	706	644	748	1995	1629	2079	1710	2240	1920
Endogenous	Syk	NM_001198977.1	268	170	189	193	132	640	395	794	659	311	978	864	922	798	437	767	189	333	389	274	313	424	1109	1683
Endogenous	Syt17	NM_138649.1	149	158	129	131	97	74	122	171	111	105	88	117	115	144	104	100	130	143	124	183	119	65	62	29
Endogenous	Tab1	NM_025609.2	1577	1821	1759	1334	681	856	1318	1191	920	742	730	1131	1153	1291	829	645	1183	1512	1198	1878	1555	1008	788	819
Endogenous	Tal1	NM_011527.2	33	19	38	30	33	18	13	16	22	19	9	27	23	26	22	36	18	24	42	45	39	24	30	28
Endogenous	Tank	NM_011529.1	946	865	801	815	361	761	788	894	711	431	709	857	974	1165	779	469	835	1190	802	1466	808	1153	1001	1058
Endogenous	Tap1	NM_001161730.1	165	296	321	240	99	1808	2268	2652	3502	1002	4812	5072	5547	10095	4706	2002	894	1018	1263	1234	1394	4619	4349	3732
Endogenous	Tap2	NM_011530.2	50	43	47	59	33	212	228	298	508	173	458	512	703	886	570	236	121	90	156	143	164	360	398	290
Endogenous	Tapbp	NM_009318.2	1649	709	1949	1709	791	1869	1840	1589	4452	954	2156	1887	3664	6883	3432	1411	583	495	1905	1153	1682	2373	2031	1356
Endogenous	Tbk1	NM_019786.4	606	446	585	619	280	305	367	278	525	246	330	326	577	739	451	215	378	347	612	733	643	423	456	412
Endogenous	Tbx21	NM_019507.1	9	17	21	20	24	20	36	37	23	23	162	134	198	84	82	47	90	99	115	73	101	412	318	402
Endogenous	Tcf7	NM_009331.3	501	252	465	476	225	187	210	298	198	140	162	155	172	333	186	124	249	262	496	306	595	342	367	387
Endogenous	Tdo2	NM_019911.2	9	18	11	19	21	7	12	12	20	24	8	13	18	13	10	15	7	10	16	14	17	13	17	30
Endogenous	Tek	NM_013690.2	151	76	121	123	65	62	23	43	48	27	30	38	48	63	59	15	103	115	187	209	168	36	137	373
Endogenous	Tfe3	NM_172472.3	517	273	469	527	265	316	278	231	383	176	227	223	337	529	271	210	246	228	564	484	561	274	360	424
Endogenous	Tfeb	NM_001161723.1	400	317	353	358	144	266	300	289	294	233	216	243	352	421	263	199	207	236	248	380	314	205	352	307
Endogenous	Tfrc	NM_011638.3	8454	2375	6499	8972	3834	2298	2034	2207	3818	1675	1620	1615	3082	5069	2879	1230	2033	1315	4197	4448	4668	1967	1643	1197
Endogenous	Tgfb1	NM_011577.1	4129	1651	3356	4526	2110	2505	1839	2113	2968	1559	2089	2037	2834	4380	2138	1609	1971	1757	4700	4994	4936	2704	3198	3061
Endogenous	Tgfb2	NM_009367.1	156	80	210	146	86	79	74	52	70	54	54	49	60	90	61	43	57	62	173	112	112	56	43	54
Endogenous	Tgfb3	NM_009368.2	517	178	398	391	215	132	127	137	162	138	60	102	151	299	119	58	159	135	316	408	317	54	86	88
Endogenous	Tgfbr1	NM_009370.2	2817	855	2089	2148	1297	800	642	1013	1016	604	629	560	880	1721	724	535	579	746	2281	1193	2274	675	715	708
Endogenous	Tgfbr2	NM_009371.2	3263	2359	3139	2708	1274	1919	1854	1771	1673	1073	1403	1721	1831	2699	1708	1064	2389	2867	3359	4068	2801	2883	2366	3817
Endogenous	Thbd	NM_009378.3	113	55	74	102	56	109	25	45	68	44	51	79	69	63	51	42	49	93	130	71	91	63	250	642
Endogenous	Thbs1	NM_011580.3	6780	3140	7409	6763	3537	1937	1906	1876	1969	1287	1021	1390	2028	3475	1940	863	3828	3505	9737	9408	6414	1410	3828	1725
Endogenous	Thy1	NM_009382.3	1240	333	1270	1035	494	559	344	376	448	176	2031	1563	2262	1506	1075	198	1023	1166	2107	1331	1821	6648	4747	4862
Endogenous	Ticam1	NM_174989.4	165	201	209	165	97	84	151	151	144	93	110	119	143	182	147	89	168	173	163	223	154	155	132	205
Endogenous	Ticam2	NM_173394.2	58	38	37	59	27	63	28	51	59	45	79	63	85	66	56	48	33	53	39	73	73	45	130	415
Endogenous	Tie1	NM_011587.2	555	184	401	471	252	263	183	160	204	115	104	181	253	278	232	114	314	265	673	572	682	158	398	374
Endogenous	Tigit	NM_001146325.1	89	34	81	128	79	51	46	93	74	45	246	278	373	207	185	56	76	102	131	83	165	863	593	541
Endogenous	Timd4	NM_178759.4	8	10	16	19	17	19	13	13	25	17	8	23	23	18	14	14	15	31	36	12	16	13	16	194
Endogenous	Tirap	NM_001177846.1	492	385	512	587	255	382	348	386	492	295	294	288	439	599	375	290	222	332	383	442	537	301	301	261
Endogenous	Tlr1	NM_030682.1	86	35	54	82	43	66	40	76	93	32	115	91	124	139	89	46	35	51	106	71	101	54	154	288
Endogenous	Tlr2	NM_011905.2	117	69	90	104	59	192	115	136	163	90	272	221	266	257	144	156	48	106	136	110	138	139	404	316
Endogenous	Tlr3	NM_126166.2	340	354	559	350	172	355	548	466	470	194	322	468	450	834	503	311	173	321	475	380	321	356	226	272
Endogenous	Tlr4	NM_021297.2	524	221	676	537	269	535	296	437	528	238	427	467	541	795	324	460	151	228	530	304	586	292	782	849
Endogenous	Tlr5	NM_016928.2	21	10	9	23	23	23	16	31	37	25	18	25	25	25	12	30	19	24	18	27	29	16	38	83
Endogenous	Tlr6	NM_011604.3	78	32	61	70	62	114	66	141	164	87	225	207	226	207	104	154	28	46	114	73	64	123	511	177
Endogenous	Tlr7	NM_133211.3	35	14	19	33	21	31	18	34	32	27	56	49	49	54	42	23	23	28	43	39	39	43	95	477
Endogenous	Tlr8	NM_133212.2	134	80	55	83	53	181	76	105	143	116	179	170	214	191	134	135	76	127	110	153	104	132	276	1221
Endogenous	Tlr9	NM_031178.2	56	31	51	32	31	58	33	61	64	38	68	61	74	76	62	59	24	39	64	52	65	24	78	251
Endogenous	Tmed1	NM_010744.3	866	303	726	910	519	297	189	177	371	221	139	138	279	535	244	125	233	198	572	448	666	219	154	224
Endogenous	Tmem173	NM_028261.1	375	152	388	408	216	434	383	261	551	198	336	268	397	664	352	270	190	162	513	358	454	429	415	447
Endogenous	Tnf	NM_013693.1	173	222	250	245	114	367	265	220	607	151	342	319	497	678	368	286	124	153	285	382	256	433	455	224
Endogenous	Tnfaip3	NM_009397.2	1133	637	912	1108	414	912	648	626	1434	497	1283	978	1450	1980	1050	725	660	658	1114	1031	1251	2342	2261	1162
Endogenous	Tnfrsf10b	NM_020275.3	1722	681	1803	2376	918	797	631	479	1246	455	316	302	635	1659	692	387	563	429	1920	1849	1703	635	435	203
Endogenous	Tnfrsf11a	NM_009399.3	548	445	683	461	254	351	373	327	465	186	231	291	353	672	335	201	289	357	471	511	472	243	281	531
Endogenous	Tnfrsf11b	NM_008764.3	15	10	21	18	15	23	17	11	26	25	13	17	20	22	13	15	16	15	9	21	21	18	13	20
Endogenous	Tnfrsf12a	NM_001161746.1	9105	4422	8699	11612	4700	4167	3254	2673	4103	1879	1954	1594	2235	6540	3018	1708	3743	3658	11919	7543	9497	4738	2950	1382
Endogenous	Tnfrsf13b	NM_021349.1	29	21	22	33	20	40	35	37	41	23	33	47	50	42	24	27	29	36	41	45	36	55	58	123
Endogenous	Tnfrsf13c	NM_028075.2	13	9	18	13	11	5	11	6	5	10	9	4	15	15	13	7	4	10	29	16	17	24	13	28
Endogenous	Tnfrsf14	NM_178931.2	217	121	211	183	72	364	345	400	680	272	654	588	1049	1085	685	331	176	173	349	301	345	581	617	613
Endogenous	Tnfrsf17	NM_011608.1	10	16	14	19	18	14	13	12	16	24	20	19	15	6	11	12	11	9	22	14	18	20	13	37
Endogenous	Tnfrsf18	NM_009400.2	16	15	25	39	18	30	31	49	62	27	126	129	147	126	62	29	28	28	75	49	71	211	228	155
Endogenous	Tnfrsf1a	NM_011609.2	3286	1613	3519	3360	1665	2422	2171	1925	4342	1435	1810	1897	2416	5699	2195	1651	1261	1282	2914	3635	2984	1449	1778	2072
Endogenous	Tnfrsf1b	NM_011610.3	1127	569	890	1136	503	1023	902	825	1884	664	1107	1244	1938	2389	1253	750	618	575	1151	1318	1268	1371	1783	1473
Endogenous	Tnfrsf4	NM_011659.2	36	24	60	38	32	40	27	74	49	33	104	77	75	112	56	25	8	18	46	33	53	94	143	76
Endogenous	Tnfrsf8	NM_009401.2	10	12	9	7	15	20	15	17	15	12	25	29	31	20	21	18	15	9	15	22	18	35	49	34
Endogenous	Tnfrsf9	NM_001077508.1	48	32	45	59	37	53	37	55	47	60	118	128	153	158	100	54	27	30	91	67	91	102	163	64
Endogenous	Tnfsf10	NM_009425.2	25	26	28	10	21	54	54	116	70	26	293	239	223	377	188	38	106	100	124	55	88	667	387	473
Endogenous	Tnfsf11	NM_011613.3	37	13	28	20	17	37	27	49	33	15	87	25	44	69	56	19	28	32	61	62	53	123	139	82
Endogenous	Tnfsf12	NM_011614.3	184	93	225	180	86	93	70	66	85	47	93	82	101	182	68	33	70	107	160	96	180	61	135	392
Endogenous	Tnfsf13	NM_023517.2	117	51	89	64	43	15	31	37	46	25	21	23	39	68	32	17	29	41	63	41	75	30	23	84
Endogenous	Tnfsf13b	NM_033622.1	43	28	45	51	24	38	34	35	63	33	42	38	62	74	58	28	17	17	57	65	55	42	71	61
Endogenous	Tnfsf14	NM_019418.2	41	32	32	40	43	157	113	170	149	79	223	244	252	212	119	138	47	66	58	64	70	190	268	229
Endogenous	Tnfsf15	NM_177371.3	17	16	18	35	16	8	4	14	16	21	18	11	16	30	14	9	9	12	29	26	34	11	13	18
Endogenous	Tnfsf18	NM_183391.3	30	37	26	24	23	41	22	22	22	22	19	15	15	22	28	35	20	16	21	25	23	14	17	20
Endogenous	Tnfsf4	NM_009452.2	143	73	137	134	73	54	63	57	51	34	68	57	65	91	58	47	67	67	155	110	111	81	92	84
Endogenous	Tnfsf8	NM_009403.2	16	18	12	21	9	19	7	12	15	16	16	11	21	20	18	12	4	18	17	28	24	16	26	16
Endogenous	Tollip	NM_023764.3	1878	1032	1694	1798	866	1045	970	854	1228	674	838	752	1053	1680	895	623	834	837	1784	1816	1785	1197	1215	1121
Endogenous	Tpsab1	NM_031187.4	36	28	37	31	33	16	27	34	28	36	16	32	34	18	20	31	14	21	24	35	33	22	25	29
Endogenous	Traf2	NM_009422.2	1571	1437	1656	1466	715	934	1171	1254	1105	732	893	1078	1345	1696	1157	609	1047	1288	1466	1808	1557	1285	1012	906
Endogenous	Traf3	NM_001048206.1	578	299	489	659	267	204	169	219	325	157	229	187	362	528	308	142	205	221	527	331	626	324	355	241
Endogenous	Traf6	NM_009424.2	511	254	457	462	256	286	254	317	284	181	324	268	413	527	266	223	250	254	511	428	510	439	538	412
Endogenous	Trem1	NM_021406.5	95	56	58	60	62	332	194	348	312	141	342	286	278	288	124	318	29	69	58	81	74	101	361	84
Endogenous	Trem2	NM_031254.2	99	69	89	85	68	102	39	66	70	60	100	104	163	112	108	44	123	144	132	152	175	128	288	829
Endogenous	Trp53	NM_011640.1	682	551	731	722	297	301	376	391	396	298	197	242	433	690	389	172	330	326	607	872	760	374	271	262
Endogenous	Twist1	NM_011658.2	53	27	56	50	17	104	23	30	54	10	25	25	30	26	22	12	30	41	78	30	61	18	54	245
Endogenous	Txk	NM_001122754.1	11	16	8	20	9	27	28	32	34	15	125	139	154	106	72	34	46	29	43	56	39	91	126	110
Endogenous	Txnip	NM_023719.1	3146	1537	3966	3405	1645	2037	1331	2747	3116	1295	2121	2156	2783	3859	1523	1802	571	976	1836	1140	2663	1838	2939	5233
Endogenous	Tyk2	NM_001205312.1	413	391	463	522	232	252	337	306	338	226	188	255	524	426	324	189	314	304	362	677	491	278	291	301
Endogenous	Ubc	NM_019639.4	18033	15832	16113	15592	6609	12164	11983	12838	12667	7317	12305	11535	14366	21328	11799	7832	13458	13684	16980	19330	17595	16247	17186	15817
Endogenous	Ulbp1	NM_029975.2	458	191	288	471	175	128	96	117	210	112	137	122	258	253	196	69	247	200	346	360	479	248	208	227
Endogenous	Usp18	NM_011909.2	75	76	110	102	78	236	215	141	418	108	264	271	343	762	322	179	70	92	285	254	299	188	255	82
Endogenous	Usp9y	NM_148943.2	8	3	5	13	5	13	8	6	10	7	10	11	8	11	12	6	2	9	8	8	8	12	13	13
Endogenous	Vcam1	NM_011693.2	3298	1616	3571	2539	1508	812	1062	1336	1404	828	787	1041	1219	3275	975	498	716	1079	1935	1937	2279	501	292	572
Endogenous	Vegfa	NM_001025250.3	8655	2626	7525	10582	5324	2115	2719	2260	4148	2097	2269	1683	3947	8360	3908	1606	4579	2319	12497	9435	12618	2242	3925	794
Endogenous	Vegfc	NM_009506.2	521	199	489	501	247	290	253	300	311	227	159	244	360	473	363	221	462	312	703	897	641	253	297	171
Endogenous	Vhl	NM_009507.3	288	104	241	285	140	133	112	123	250	93	110	122	127	305	146	126	101	80	264	323	251	145	150	88
Endogenous	Vim	NM_011701.4	27502	30152	31088	32463	14858	20376	22397	23505	21946	13538	25233	18877	24552	41681	27871	11335	31601	36145	33657	34412	47297	40490	30439	35250
Endogenous	Vwf	NM_011708.3	211	132	227	202	107	145	108	124	97	75	66	70	63	155	108	57	150	117	366	226	234	91	198	257
Endogenous	Xaf1	NM_001037713.3	237	260	278	215	118	944	1561	1163	1519	636	1869	2017	2090	2492	1575	1291	259	335	413	393	465	1044	1307	588
Endogenous	Xbp1	NM_013842.2	4781	2153	5136	4871	2307	2091	1695	2140	2557	1320	1338	1508	2083	3342	1598	1332	1420	1702	3493	3100	3436	1509	1683	1769
Endogenous	Xcl1	NM_008510.1	26	71	68	46	19	202	171	581	284	103	620	607	587	675	463	186	58	153	186	158	191	1016	780	328
Endogenous	Xcr1	NM_011798.4	15	21	27	25	35	26	27	29	39	27	23	30	34	52	48	34	14	27	15	44	29	35	32	44
Endogenous	Ythdf2	NM_145393.4	1725	675	1526	1832	818	704	486	539	815	389	478	427	558	1217	567	363	506	562	1654	1097	1606	973	800	818
Endogenous	Yy1	NM_009537.3	2667	1732	2527	2867	1316	1199	1238	1452	1577	867	1305	1216	1634	2751	1369	693	1435	1524	2430	2389	3180	2118	1890	1833
Endogenous	Zap70	NM_009539.2	39	51	40	55	23	72	93	187	101	73	611	602	838	394	465	60	568	591	409	623	474	2259	1749	1978
Endogenous	Zbp1	NM_021394.2	138	140	146	131	45	1918	2079	1906	2709	893	3814	4227	4346	5175	2681	2121	243	355	337	293	346	2098	2362	956
Endogenous	Zfp13	NM_011747.2	122	65	88	85	33	34	55	48	55	35	36	52	57	65	57	25	53	55	59	80	70	32	32	41
Housekeeping	Abcf1	NM_013854.1	835	586	838	854	501	426	497	360	548	285	302	316	484	813	485	248	526	453	875	895	850	654	428	358
Housekeeping	Alas1	NM_020559.2	789	491	841	823	478	659	523	621	808	527	709	768	1019	1141	661	567	384	466	785	871	1056	519	869	648
Housekeeping	Edc3	NM_153799.3	601	363	613	620	266	160	221	223	280	160	172	167	266	516	252	109	250	265	500	621	589	317	306	257
Housekeeping	Eef1g	NM_026007.4	9834	4662	8705	11735	4826	4696	3937	4695	5751	2941	3922	3511	5315	8745	4435	2500	3971	4366	8612	5490	10273	7391	5912	5785
Housekeeping	Eif2b4	NM_001127355.1	457	292	432	500	192	264	224	210	333	129	191	163	300	419	259	111	221	214	419	530	380	323	254	245
Housekeeping	G6pdx	NM_008062.2	966	683	1086	930	456	833	675	717	694	433	881	669	727	1290	679	481	625	827	1088	724	1111	1440	1221	2146
Housekeeping	Gusb	NM_010368.1	1628	1109	1833	1488	864	818	892	837	803	532	636	651	929	1328	825	537	872	992	1604	1382	1509	987	972	1771
Housekeeping	Hdac3	NM_010411.2	2500	1837	2584	2744	1210	1656	1820	1453	1938	1140	1080	1117	1880	2249	1551	1098	1495	1676	2394	2753	2301	1800	1425	1064
Housekeeping	Hprt	NM_013556.2	4098	1975	3140	4739	1642	2708	1967	1970	2767	1325	2273	1786	2592	3782	2224	1344	1748	2110	3184	3298	4572	4129	3518	4115
Housekeeping	Nubp1	NM_011955.2	587	575	577	653	325	493	509	483	607	351	525	540	776	1037	661	275	489	484	569	726	773	912	683	661
Housekeeping	Oaz1	NM_008753.4	5622	3201	5220	6309	2864	4401	3110	3426	3368	2063	3865	3434	4533	5429	3157	2213	2932	3383	5786	4028	6271	7876	6808	7353
Housekeeping	Polr1b	NM_009086.2	681	382	758	788	400	259	266	220	419	165	167	167	334	595	369	114	337	262	687	618	596	322	210	173
Housekeeping	Polr2a	NM_009089.2	4910	2571	4464	3975	2098	1609	1761	1758	1854	1125	1580	1418	2062	3140	1775	1022	2438	2214	5013	3215	4224	2793	2612	2139
Housekeeping	Ppia	NM_008907.1	14003	10493	12644	14606	6017	9642	8801	9319	8514	5421	7351	6784	9485	12793	7659	5257	8718	9517	10264	12186	13643	13812	10811	10357
Housekeeping	Rpl19	NM_009078.2	27210	21342	27311	30811	13005	20111	18019	21457	20646	11973	18856	17504	23837	34857	20081	11151	18327	19129	26525	30966	32811	33412	26055	27138
Housekeeping	Sap130	NM_172965.2	1015	931	1128	949	503	521	601	496	565	418	507	392	615	967	588	319	751	731	1074	1253	1030	858	712	667
Housekeeping	Sdha	NM_023281.1	889	489	1043	972	475	489	370	490	478	295	403	361	453	823	375	258	342	458	990	608	1094	757	772	956
Housekeeping	Sf3a3	NM_029157.3	2408	1576	1937	2554	926	1814	1674	1609	1821	1250	1317	1397	2218	2279	1734	1325	1308	1466	1785	2329	2158	1837	1662	1247
Housekeeping	Tbp	NM_013684.3	702	573	802	663	363	311	372	300	386	229	261	236	423	660	422	190	464	440	718	852	667	487	435	367
Housekeeping	Tubb5	NM_011655.4	1250	772	899	1362	600	991	802	761	1217	796	768	694	1217	1370	1013	582	794	638	955	1280	1329	1258	1438	1009
